# Supplementary material for: Label-Free LC-MS Profiling of Skeletal Muscle Reveals Heart-Type Fatty Acid Binding Protein as a Candidate Biomarker of Aerobic Capacity
Source: Proteomes. 2013 Dec 18;1(3):290–308. doi: 10.3390/proteomes1030290 (PMC3997170; doi:10.3390/proteomes1030290)
Supplement: Supplementary File 1 [file proteomes-01-00290-s001.xlsx]

## Sheet: Progenesis output
									Normalized abundance											Raw abundance											Spectral counts
									LCR					HCR						LCR					HCR						LCR					HCR						Tags
Accession	Peptide count	Peptides used for quantitation	Confidence score	Anova (p)	Max fold change	Highest mean condition	Lowest mean condition	Description	M-LCR B1_GD1_01_666	M-LCR B2_GD2_01_670	M-LCR B4_GD4_01_678	M-LCR B5_GD5_01_683	M-LCR B6_GD6_01_687	M-HCR D2_GE2_01_672	M-HCR D3_GE3_01_676	M-HCR D4_GE4_01_680	M-HCR D5_GE5_01_685	M-HCR D6_GE6_01_689	M-HCR D1_GE1_01_668	M-LCR B1_GD1_01_666	M-LCR B2_GD2_01_670	M-LCR B4_GD4_01_678	M-LCR B5_GD5_01_683	M-LCR B6_GD6_01_687	M-HCR D2_GE2_01_672	M-HCR D3_GE3_01_676	M-HCR D4_GE4_01_680	M-HCR D5_GE5_01_685	M-HCR D6_GE6_01_689	M-HCR D1_GE1_01_668	M-LCR B1_GD1_01_666	M-LCR B2_GD2_01_670	M-LCR B4_GD4_01_678	M-LCR B5_GD5_01_683	M-LCR B6_GD6_01_687	M-HCR D2_GE2_01_672	M-HCR D3_GE3_01_676	M-HCR D4_GE4_01_680	M-HCR D5_GE5_01_685	M-HCR D6_GE6_01_689	M-HCR D1_GE1_01_668	P<0.05
MYH7_RAT	135	135	6860.69	0.754217	1.01142	LCR	HCR	Myosin-7 OS=Rattus norvegicus GN=Myh7 PE=2 SV=2	5.69179e+09	6.1167e+09	5.88571e+09	4.51637e+09	7.00828e+09	7.39314e+09	7.89932e+09	5.17816e+09	5.58601e+09	6.18129e+09	2.42897e+09	6.2143e+09	6.02612e+09	4.99795e+09	4.41093e+09	7.00828e+09	7.34576e+09	6.61363e+09	4.65923e+09	5.49848e+09	5.61633e+09	1.97893e+09	0	0	0	0	0	0	0	0	0	0	0
MYH6_RAT	3	3	126.05	0.891706	1.01344	HCR	LCR	Myosin-6 OS=Rattus norvegicus GN=Myh6 PE=2 SV=2	8.36703e+07	9.00341e+07	9.33984e+07	6.90119e+07	1.0449e+08	1.09326e+08	1.24972e+08	8.03648e+07	8.58114e+07	9.01835e+07	4.51766e+07	9.13513e+07	8.87009e+07	7.93108e+07	6.74006e+07	1.0449e+08	1.08625e+08	1.04631e+08	7.2311e+07	8.44668e+07	8.19409e+07	3.68062e+07	0	0	0	0	0	0	0	0	0	0	0
ALBU_RAT	33	33	1831.7	0.423656	1.05032	LCR	HCR	Serum albumin OS=Rattus norvegicus GN=Alb PE=1 SV=2	2.11948e+09	1.91304e+09	2.32778e+09	1.96329e+09	1.76799e+09	1.77995e+09	1.73536e+09	1.8447e+09	2.04616e+09	1.96855e+09	2.15499e+09	2.31405e+09	1.88471e+09	1.97667e+09	1.91745e+09	1.76799e+09	1.76855e+09	1.45292e+09	1.65983e+09	2.0141e+09	1.78863e+09	1.75571e+09	0	0	0	0	0	0	0	0	0	0	0
ACON_RAT	26	26	1002.21	0.168278	1.10772	HCR	LCR	Aconitate hydratase, mitochondrial OS=Rattus norvegicus GN=Aco2 PE=1 SV=2	4.99952e+08	5.48123e+08	5.33581e+08	5.29869e+08	4.35512e+08	4.92976e+08	5.50656e+08	5.83528e+08	5.01459e+08	5.67547e+08	6.89516e+08	5.45848e+08	5.40006e+08	4.53099e+08	5.17498e+08	4.35512e+08	4.89817e+08	4.61032e+08	5.2505e+08	4.93602e+08	5.15674e+08	5.61762e+08	0	0	0	0	0	0	0	0	0	0	0
AT2A2_RAT	29	18	1728.07	0.706853	1.03952	LCR	HCR	Sarcoplasmic/endoplasmic reticulum calcium ATPase 2 OS=Rattus norvegicus GN=Atp2a2 PE=1 SV=1	7.77186e+08	6.13597e+08	6.85299e+08	5.83546e+08	4.98414e+08	5.90668e+08	5.98556e+08	6.69112e+08	5.23898e+08	5.45609e+08	7.17726e+08	8.48531e+08	6.04511e+08	5.81933e+08	5.69921e+08	4.98414e+08	5.86883e+08	5.01136e+08	6.02057e+08	5.15689e+08	4.95741e+08	5.84745e+08	0	0	0	0	0	0	0	0	0	0	0
KPYM_RAT	19	19	1008.25	0.694277	1.02443	LCR	HCR	Pyruvate kinase isozymes M1/M2 OS=Rattus norvegicus GN=Pkm2 PE=1 SV=3	2.92055e+08	3.64443e+08	3.75752e+08	3.43895e+08	3.32138e+08	2.92855e+08	3.05949e+08	3.47846e+08	3.24544e+08	3.36858e+08	3.93e+08	3.18866e+08	3.59046e+08	3.19076e+08	3.35866e+08	3.32138e+08	2.90979e+08	2.56153e+08	3.12987e+08	3.19459e+08	3.0607e+08	3.20184e+08	0	0	0	0	0	0	0	0	0	0	0
AT2A1_RAT	23	13	997.15	0.405927	1.11403	LCR	HCR	Sarcoplasmic/endoplasmic reticulum calcium ATPase 1 OS=Rattus norvegicus GN=Atp2a1 PE=2 SV=1	1.10488e+08	1.68145e+08	2.05792e+08	1.578e+08	1.6398e+08	1.28913e+08	1.38087e+08	1.63068e+08	1.57675e+08	1.64037e+08	1.16637e+08	1.20631e+08	1.65655e+08	1.74751e+08	1.54116e+08	1.6398e+08	1.28087e+08	1.15612e+08	1.46726e+08	1.55204e+08	1.49044e+08	9.50264e+07	0	0	0	0	0	0	0	0	0	0	0
HS90B_RAT	15	13	461.53	0.43319	1.05441	HCR	LCR	Heat shock protein HSP 90-beta OS=Rattus norvegicus GN=Hsp90ab1 PE=1 SV=4	1.01667e+08	8.5041e+07	1.02757e+08	7.86873e+07	7.49643e+07	9.36582e+07	9.89316e+07	9.90992e+07	8.16015e+07	8.57832e+07	1.01598e+08	1.11e+08	8.37817e+07	8.72576e+07	7.68501e+07	7.49643e+07	9.30581e+07	8.28296e+07	8.9168e+07	8.03228e+07	7.79428e+07	8.27739e+07	0	0	0	0	0	0	0	0	0	0	0
ACTS_RAT	32	32	2070.47	0.893666	1.01047	HCR	LCR	Actin, alpha skeletal muscle OS=Rattus norvegicus GN=Acta1 PE=2 SV=1	3.44199e+09	4.06304e+09	4.25567e+09	3.13863e+09	4.88514e+09	4.7786e+09	5.42218e+09	3.68846e+09	3.90668e+09	4.25188e+09	1.94213e+09	3.75797e+09	4.00287e+09	3.61377e+09	3.06535e+09	4.88514e+09	4.74798e+09	4.53967e+09	3.31882e+09	3.84547e+09	3.86327e+09	1.58229e+09	0	0	0	0	0	0	0	0	0	0	0
PYGM_RAT	16	16	501.4	0.535881	1.04428	HCR	LCR	Glycogen phosphorylase, muscle form OS=Rattus norvegicus GN=Pygm PE=2 SV=5	3.25036e+08	3.29153e+08	4.3575e+08	3.73884e+08	2.95793e+08	3.79554e+08	3.80506e+08	4.1312e+08	3.28901e+08	3.1976e+08	3.83196e+08	3.54874e+08	3.24278e+08	3.70025e+08	3.65155e+08	2.95793e+08	3.77122e+08	3.18575e+08	3.71719e+08	3.23747e+08	2.90535e+08	3.12197e+08	0	0	0	0	0	0	0	0	0	0	0
ALDOA_RAT	22	22	1220.04	0.897946	1.01971	HCR	LCR	Fructose-bisphosphate aldolase A OS=Rattus norvegicus GN=Aldoa PE=1 SV=2	7.93551e+08	1.15937e+09	1.0769e+09	1.00598e+09	9.77428e+08	8.16357e+08	8.97108e+08	1.02299e+09	9.95173e+08	1.00972e+09	1.3931e+09	8.66399e+08	1.1422e+09	9.1447e+08	9.8249e+08	9.77428e+08	8.11126e+08	7.51095e+08	9.20467e+08	9.7958e+08	9.17437e+08	1.13498e+09	0	0	0	0	0	0	0	0	0	0	0
ATPB_RAT	21	21	1133.02	0.0325988	1.13991	HCR	LCR	ATP synthase subunit beta, mitochondrial OS=Rattus norvegicus GN=Atp5b PE=1 SV=2	6.48606e+08	7.79217e+08	7.87638e+08	7.94197e+08	6.91117e+08	7.5896e+08	8.27266e+08	9.49671e+08	7.94874e+08	8.33785e+08	8.97693e+08	7.08148e+08	7.67678e+08	6.68836e+08	7.75654e+08	6.91117e+08	7.54097e+08	6.92621e+08	8.545e+08	7.82419e+08	7.57579e+08	7.31368e+08	0	0	0	0	0	0	0	0	0	0	0	x
PGK1_RAT	15	15	595.6	0.758118	1.02142	HCR	LCR	Phosphoglycerate kinase 1 OS=Rattus norvegicus GN=Pgk1 PE=1 SV=2	2.31642e+08	2.92857e+08	2.98531e+08	2.86514e+08	2.57656e+08	2.38716e+08	2.71201e+08	2.97863e+08	2.59039e+08	2.8329e+08	3.25671e+08	2.52906e+08	2.8852e+08	2.53502e+08	2.79824e+08	2.57656e+08	2.37186e+08	2.2706e+08	2.68013e+08	2.5498e+08	2.57398e+08	2.65331e+08	0	0	0	0	0	0	0	0	0	0	0
ATPA_RAT	19	19	882.09	0.0532608	1.0993	HCR	LCR	ATP synthase subunit alpha, mitochondrial OS=Rattus norvegicus GN=Atp5a1 PE=1 SV=2	5.0702e+08	5.94215e+08	6.32815e+08	5.58923e+08	5.3693e+08	5.90935e+08	6.3421e+08	6.73153e+08	5.74359e+08	6.37992e+08	6.22455e+08	5.53564e+08	5.85416e+08	5.37366e+08	5.45873e+08	5.3693e+08	5.87149e+08	5.30986e+08	6.05693e+08	5.65359e+08	5.79681e+08	5.07126e+08	0	0	0	0	0	0	0	0	0	0	0
IDHP_RAT	18	18	902.93	0.272195	1.1059	HCR	LCR	Isocitrate dehydrogenase [NADP], mitochondrial OS=Rattus norvegicus GN=Idh2 PE=1 SV=2	4.65634e+08	4.97346e+08	4.68289e+08	5.05981e+08	4.025e+08	4.67404e+08	4.77414e+08	5.19468e+08	4.32389e+08	5.28945e+08	6.79412e+08	5.0838e+08	4.89981e+08	3.97656e+08	4.94167e+08	4.025e+08	4.64409e+08	3.99711e+08	4.6741e+08	4.25614e+08	4.80601e+08	5.5353e+08	0	0	0	0	0	0	0	0	0	0	0
HSP7C_RAT	15	9	729.13	0.872331	1.00824	HCR	LCR	Heat shock cognate 71 kDa protein OS=Rattus norvegicus GN=Hspa8 PE=1 SV=1	1.2624e+08	1.14369e+08	1.31508e+08	1.22289e+08	1.02667e+08	1.1465e+08	1.16643e+08	1.29527e+08	1.12806e+08	1.11946e+08	1.3682e+08	1.37829e+08	1.12675e+08	1.11672e+08	1.19434e+08	1.02667e+08	1.13916e+08	9.76587e+07	1.16547e+08	1.11038e+08	1.01715e+08	1.1147e+08	0	0	0	0	0	0	0	0	0	0	0
TRFE_RAT	17	17	654.5	0.947126	1.00047	LCR	HCR	Serotransferrin OS=Rattus norvegicus GN=Tf PE=1 SV=3	2.08228e+08	1.98361e+08	2.39827e+08	2.02207e+08	1.68232e+08	1.81216e+08	1.96876e+08	2.17404e+08	2.09243e+08	2.00557e+08	2.14355e+08	2.27343e+08	1.95423e+08	2.03653e+08	1.97486e+08	1.68232e+08	1.80054e+08	1.64833e+08	1.95617e+08	2.05964e+08	1.82226e+08	1.74639e+08	0	0	0	0	0	0	0	0	0	0	0
CAH3_RAT	24	24	1151.41	0.886896	1.03546	HCR	LCR	Carbonic anhydrase 3 OS=Rattus norvegicus GN=Ca3 PE=1 SV=3	5.94211e+09	4.61824e+09	4.85769e+09	4.66706e+09	4.66414e+09	4.36447e+09	4.55554e+09	4.88437e+09	4.35663e+09	4.74197e+09	7.84934e+09	6.4876e+09	4.54985e+09	4.12498e+09	4.55809e+09	4.66414e+09	4.33651e+09	3.81409e+09	4.39489e+09	4.28836e+09	4.30857e+09	6.395e+09	0	0	0	0	0	0	0	0	0	0	0
KCRM_RAT	20	20	1019.98	0.761719	1.03002	HCR	LCR	Creatine kinase M-type OS=Rattus norvegicus GN=Ckm PE=1 SV=2	2.19479e+09	2.75703e+09	2.99822e+09	2.6567e+09	2.31457e+09	2.19911e+09	2.42616e+09	2.77481e+09	2.44177e+09	2.74997e+09	3.37922e+09	2.39628e+09	2.7162e+09	2.54599e+09	2.59468e+09	2.31457e+09	2.18502e+09	2.03128e+09	2.49673e+09	2.40351e+09	2.49863e+09	2.75311e+09	0	0	0	0	0	0	0	0	0	0	0
MDHM_RAT	14	14	796.36	0.0921899	1.11162	HCR	LCR	Malate dehydrogenase, mitochondrial OS=Rattus norvegicus GN=Mdh2 PE=1 SV=2	5.01686e+08	5.92242e+08	5.63407e+08	5.76309e+08	5.02449e+08	5.36763e+08	5.88003e+08	6.46262e+08	5.59566e+08	6.11584e+08	7.07627e+08	5.47741e+08	5.83472e+08	4.78427e+08	5.62853e+08	5.02449e+08	5.33324e+08	4.923e+08	5.81497e+08	5.50798e+08	5.55687e+08	5.76517e+08	0	0	0	0	0	0	0	0	0	0	0
ANXA6_RAT	12	12	371.05	0.513889	1.03347	HCR	LCR	Annexin A6 OS=Rattus norvegicus GN=Anxa6 PE=1 SV=2	1.29378e+08	1.22979e+08	1.39158e+08	1.13825e+08	1.11171e+08	1.1794e+08	1.30554e+08	1.1827e+08	1.24796e+08	1.29112e+08	1.43905e+08	1.41255e+08	1.21158e+08	1.18169e+08	1.11167e+08	1.11171e+08	1.17184e+08	1.09305e+08	1.06417e+08	1.2284e+08	1.17311e+08	1.17242e+08	0	0	0	0	0	0	0	0	0	0	0
DESM_RAT	15	15	695	0.638142	1.02931	LCR	HCR	Desmin OS=Rattus norvegicus GN=Des PE=2 SV=2	1.99258e+08	1.89782e+08	2.30669e+08	1.88741e+08	2.12973e+08	2.22113e+08	2.25088e+08	1.80188e+08	1.9334e+08	2.08134e+08	1.61946e+08	2.1755e+08	1.86972e+08	1.95877e+08	1.84334e+08	2.12973e+08	2.20689e+08	1.88453e+08	1.62131e+08	1.9031e+08	1.89111e+08	1.3194e+08	0	0	0	0	0	0	0	0	0	0	0
ENOB_RAT	19	12	758.31	0.78587	1.01099	LCR	HCR	Beta-enolase OS=Rattus norvegicus GN=Eno3 PE=1 SV=3	4.18833e+08	4.50905e+08	4.6023e+08	3.99787e+08	4.21547e+08	3.70585e+08	4.23235e+08	3.57737e+08	4.08644e+08	4.13159e+08	5.80134e+08	4.57282e+08	4.44228e+08	3.90812e+08	3.90453e+08	4.21547e+08	3.68211e+08	3.5435e+08	3.21886e+08	4.0224e+08	3.75397e+08	4.72646e+08	0	0	0	0	0	0	0	0	0	0	0
MYPC1_RAT	9	9	345.34	0.834391	1.03287	HCR	LCR	Myosin-binding protein C, slow-type (Fragment) OS=Rattus norvegicus GN=Mybpc1 PE=2 SV=1	9.49245e+07	1.10397e+08	1.11736e+08	8.75329e+07	1.21214e+08	1.22043e+08	1.33217e+08	9.08936e+07	1.08029e+08	1.19615e+08	7.79045e+07	1.03639e+08	1.08762e+08	9.48824e+07	8.54892e+07	1.21214e+08	1.21261e+08	1.11535e+08	8.17847e+07	1.06336e+08	1.08683e+08	6.34702e+07	0	0	0	0	0	0	0	0	0	0	0
TBB2C_RAT	14	5	572.66	0.388726	1.05761	HCR	LCR	Tubulin beta-2C chain OS=Rattus norvegicus GN=Tubb2c PE=1 SV=1	7.89519e+07	7.28511e+07	9.1692e+07	6.56199e+07	6.51432e+07	7.46045e+07	8.1744e+07	8.11559e+07	7.20336e+07	7.55513e+07	8.98949e+07	8.61997e+07	7.17723e+07	7.78618e+07	6.40879e+07	6.51432e+07	7.41264e+07	6.84394e+07	7.30229e+07	7.09049e+07	6.8646e+07	7.32391e+07	0	0	0	0	0	0	0	0	0	0	0
KCRS_RAT	19	19	749.88	0.279094	1.07431	HCR	LCR	Creatine kinase S-type, mitochondrial OS=Rattus norvegicus GN=Ckmt2 PE=1 SV=2	5.54303e+08	6.29835e+08	6.28941e+08	6.75571e+08	5.1855e+08	5.83272e+08	6.52157e+08	6.73147e+08	5.63401e+08	6.65292e+08	7.39528e+08	6.05188e+08	6.20508e+08	5.34076e+08	6.59798e+08	5.1855e+08	5.79534e+08	5.46013e+08	6.05688e+08	5.54573e+08	6.04486e+08	6.02507e+08	0	0	0	0	0	0	0	0	0	0	0
VIME_RAT	9	9	294.73	0.940503	1.0057	LCR	HCR	Vimentin OS=Rattus norvegicus GN=Vim PE=1 SV=2	5.88802e+07	5.90535e+07	7.43669e+07	5.57763e+07	5.86247e+07	6.02282e+07	6.94309e+07	6.14702e+07	6.24597e+07	6.26122e+07	4.97555e+07	6.42854e+07	5.8179e+07	6.31499e+07	5.44741e+07	5.86247e+07	5.98423e+07	5.81303e+07	5.531e+07	6.1481e+07	5.68896e+07	4.05367e+07	0	0	0	0	0	0	0	0	0	0	0
QCR2_RAT	15	15	458.56	0.0290126	1.09284	HCR	LCR	Cytochrome b-c1 complex subunit 2, mitochondrial OS=Rattus norvegicus GN=Uqcrc2 PE=1 SV=2	1.48028e+08	1.72405e+08	1.7328e+08	1.69395e+08	1.70744e+08	1.69541e+08	1.8781e+08	1.87704e+08	1.75645e+08	1.80037e+08	1.92788e+08	1.61617e+08	1.69852e+08	1.47144e+08	1.6544e+08	1.70744e+08	1.68455e+08	1.57242e+08	1.68893e+08	1.72893e+08	1.63582e+08	1.57068e+08	0	0	0	0	0	0	0	0	0	0	0	x
HBB1_RAT	15	5	847.18	0.226111	1.20655	HCR	LCR	Hemoglobin subunit beta-1 OS=Rattus norvegicus GN=Hbb PE=1 SV=3	1.3721e+09	9.20897e+08	1.00437e+09	5.84052e+08	5.82239e+08	8.137e+08	1.27616e+09	9.25946e+08	9.38402e+08	1.20667e+09	1.30186e+09	1.49806e+09	9.0726e+08	8.52875e+08	5.70416e+08	5.82239e+08	8.08486e+08	1.06845e+09	8.33152e+08	9.23698e+08	1.09638e+09	1.06065e+09	0	0	0	0	0	0	0	0	0	0	0
MYL3_RAT	17	17	922.53	0.870941	1.05887	HCR	LCR	Myosin light chain 3 OS=Rattus norvegicus GN=Myl3 PE=1 SV=2	9.92889e+08	1.17682e+09	1.1365e+09	8.74203e+08	1.39718e+09	1.41329e+09	1.58465e+09	1.0808e+09	1.13757e+09	1.26306e+09	6.07775e+08	1.08404e+09	1.15939e+09	9.65074e+08	8.53793e+08	1.39718e+09	1.40423e+09	1.32673e+09	9.72489e+08	1.11975e+09	1.14762e+09	4.95166e+08	0	0	0	0	0	0	0	0	0	0	0
HBB2_RAT	17	5	734.55	0.654245	1.05582	HCR	LCR	Hemoglobin subunit beta-2 OS=Rattus norvegicus PE=1 SV=2	1.8115e+08	1.40514e+08	1.53358e+08	9.58256e+07	7.38419e+07	1.06309e+08	1.5231e+08	1.09885e+08	1.12502e+08	1.85083e+08	1.5072e+08	1.97779e+08	1.38433e+08	1.30227e+08	9.35883e+07	7.38419e+07	1.05628e+08	1.2752e+08	9.88731e+07	1.10739e+08	1.68166e+08	1.22794e+08	0	0	0	0	0	0	0	0	0	0	0
TPM1_RAT	10	4	598.4	0.921148	1.00594	HCR	LCR	Tropomyosin alpha-1 chain OS=Rattus norvegicus GN=Tpm1 PE=1 SV=3	7.24369e+07	7.60579e+07	8.15054e+07	7.85327e+07	1.04818e+08	1.00014e+08	1.07791e+08	8.34275e+07	7.90831e+07	7.90835e+07	4.95673e+07	7.90867e+07	7.49316e+07	6.92116e+07	7.66991e+07	1.04818e+08	9.93731e+07	9.0247e+07	7.50669e+07	7.78439e+07	7.18554e+07	4.03834e+07	0	0	0	0	0	0	0	0	0	0	0
LDHB_RAT	13	11	622.62	0.127742	1.20032	HCR	LCR	L-lactate dehydrogenase B chain OS=Rattus norvegicus GN=Ldhb PE=1 SV=2	3.91086e+08	4.11227e+08	4.55301e+08	3.63996e+08	3.30801e+08	4.31069e+08	4.29006e+08	4.4904e+08	3.58483e+08	4.9365e+08	6.50978e+08	4.26988e+08	4.05137e+08	3.86626e+08	3.55497e+08	3.30801e+08	4.28307e+08	3.59181e+08	4.0404e+08	3.52866e+08	4.48531e+08	5.30364e+08	0	0	0	0	0	0	0	0	0	0	0
PGM1_RAT	14	14	513.78	0.779807	1.01458	LCR	HCR	Phosphoglucomutase-1 OS=Rattus norvegicus GN=Pgm1 PE=1 SV=2	8.75814e+07	1.01856e+08	1.06669e+08	9.22839e+07	9.28615e+07	8.90048e+07	8.62667e+07	9.2518e+07	8.63341e+07	9.9108e+07	1.15972e+08	9.56214e+07	1.00348e+08	9.05802e+07	9.01293e+07	9.28615e+07	8.84345e+07	7.2226e+07	8.32463e+07	8.49813e+07	9.00497e+07	9.44848e+07	0	0	0	0	0	0	0	0	0	0	0
FHL1_RAT	17	17	639.45	0.572483	1.04802	HCR	LCR	Four and a half LIM domains protein 1 OS=Rattus norvegicus GN=Fhl1 PE=2 SV=1	7.78981e+08	8.12439e+08	9.85378e+08	6.32438e+08	6.34713e+08	6.94241e+08	8.15986e+08	7.68436e+08	7.14522e+08	8.9972e+08	9.41324e+08	8.50492e+08	8.00408e+08	8.3675e+08	6.17672e+08	6.34713e+08	6.89793e+08	6.83177e+08	6.91428e+08	7.03326e+08	8.17487e+08	7.66914e+08	0	0	0	0	0	0	0	0	0	0	0
TPM2_RAT	10	6	727.78	0.738456	1.02917	LCR	HCR	Tropomyosin beta chain OS=Rattus norvegicus GN=Tpm2 PE=2 SV=1	1.9535e+08	2.56469e+08	2.48048e+08	1.7977e+08	2.59117e+08	2.54116e+08	2.84083e+08	1.86637e+08	2.19036e+08	2.61875e+08	1.22031e+08	2.13283e+08	2.52671e+08	2.10634e+08	1.75573e+08	2.59117e+08	2.52488e+08	2.37846e+08	1.67933e+08	2.15604e+08	2.3794e+08	9.94211e+07	0	0	0	0	0	0	0	0	0	0	0
MYH8_RAT	4	4	201.37	0.436694	1.14486	LCR	HCR	Myosin-8 (Fragment) OS=Rattus norvegicus GN=Myh8 PE=2 SV=1	3.70965e+07	5.72065e+07	5.19122e+07	5.51216e+07	8.02099e+07	4.27791e+07	5.08935e+07	3.88016e+07	6.20765e+07	6.89991e+07	3.15564e+07	4.0502e+07	5.63593e+07	4.40821e+07	5.38346e+07	8.02099e+07	4.2505e+07	4.26101e+07	3.49131e+07	6.11038e+07	6.26927e+07	2.57096e+07	0	0	0	0	0	0	0	0	0	0	0
AATM_RAT	11	11	558.03	0.122768	1.08868	HCR	LCR	Aspartate aminotransferase, mitochondrial OS=Rattus norvegicus GN=Got2 PE=1 SV=2	2.03334e+08	2.13918e+08	2.21495e+08	1.8067e+08	2.00114e+08	2.0828e+08	2.25459e+08	2.22057e+08	1.99034e+08	2.21513e+08	2.55584e+08	2.22e+08	2.1075e+08	1.88086e+08	1.76452e+08	2.00114e+08	2.06946e+08	1.88763e+08	1.99804e+08	1.95916e+08	2.01268e+08	2.08229e+08	0	0	0	0	0	0	0	0	0	0	0
TRI72_RAT	11	11	516.27	0.914568	1.00389	HCR	LCR	Tripartite motif-containing protein 72 OS=Rattus norvegicus GN=Trim72 PE=2 SV=1	1.34909e+08	1.35438e+08	1.42076e+08	1.46061e+08	1.29669e+08	1.3737e+08	1.32286e+08	1.44384e+08	1.28241e+08	1.37401e+08	1.49312e+08	1.47294e+08	1.33432e+08	1.20646e+08	1.42651e+08	1.29669e+08	1.3649e+08	1.10755e+08	1.29915e+08	1.26231e+08	1.24843e+08	1.21647e+08	0	0	0	0	0	0	0	0	0	0	0
ODO1_RAT	13	13	236.54	0.087205	1.08025	HCR	LCR	2-oxoglutarate dehydrogenase, mitochondrial OS=Rattus norvegicus GN=Ogdh PE=1 SV=1	8.57785e+07	9.23778e+07	1.02483e+08	8.7354e+07	8.2359e+07	9.2251e+07	9.80104e+07	1.01639e+08	9.12972e+07	1.03779e+08	9.68168e+07	9.3653e+07	9.10098e+07	8.70254e+07	8.53145e+07	8.2359e+07	9.16599e+07	8.20583e+07	9.14533e+07	8.98666e+07	9.42938e+07	7.88785e+07	0	0	0	0	0	0	0	0	0	0	0
ACSL1_RAT	11	11	272.93	0.175943	1.08742	HCR	LCR	Long-chain-fatty-acid--CoA ligase 1 OS=Rattus norvegicus GN=Acsl1 PE=1 SV=1	1.02605e+08	1.09005e+08	1.11871e+08	1.02844e+08	9.23706e+07	1.04272e+08	1.10261e+08	1.21591e+08	9.99224e+07	1.08574e+08	1.32231e+08	1.12024e+08	1.07391e+08	9.49973e+07	1.00443e+08	9.23706e+07	1.03604e+08	9.23149e+07	1.09406e+08	9.83566e+07	9.86504e+07	1.07731e+08	0	0	0	0	0	0	0	0	0	0	0
TBA4A_RAT	10	4	419.74	0.943526	1.01224	LCR	HCR	Tubulin alpha-4A chain OS=Rattus norvegicus GN=Tuba4a PE=2 SV=1	4.89096e+07	4.22307e+07	5.65538e+07	4.23473e+07	3.80354e+07	4.18062e+07	4.49316e+07	5.14121e+07	4.11882e+07	4.4172e+07	4.68714e+07	5.33995e+07	4.16053e+07	4.80236e+07	4.13586e+07	3.80354e+07	4.15383e+07	3.76186e+07	4.62598e+07	4.05428e+07	4.01348e+07	3.8187e+07	0	0	0	0	0	0	0	0	0	0	0
TPIS_RAT	9	9	729.58	0.695711	1.02646	LCR	HCR	Triosephosphate isomerase OS=Rattus norvegicus GN=Tpi1 PE=1 SV=2	4.2084e+08	5.44917e+08	5.21203e+08	4.64129e+08	4.78725e+08	4.14195e+08	4.33236e+08	4.81974e+08	4.3424e+08	4.44353e+08	6.3262e+08	4.59473e+08	5.36848e+08	4.42588e+08	4.53293e+08	4.78725e+08	4.11541e+08	3.62723e+08	4.33673e+08	4.27436e+08	4.0374e+08	5.15407e+08	0	0	0	0	0	0	0	0	0	0	0
MDHC_RAT	14	14	642.83	0.231412	1.1256	HCR	LCR	Malate dehydrogenase, cytoplasmic OS=Rattus norvegicus GN=Mdh1 PE=1 SV=3	3.484e+08	4.34134e+08	4.19641e+08	3.93215e+08	3.40071e+08	3.83795e+08	4.06516e+08	4.78355e+08	3.52387e+08	4.32866e+08	5.60335e+08	3.80383e+08	4.27705e+08	3.56345e+08	3.84034e+08	3.40071e+08	3.81335e+08	3.40352e+08	4.30416e+08	3.46866e+08	3.93303e+08	4.56515e+08	0	0	0	0	0	0	0	0	0	0	0
HSP71_RAT	5	5	220.59	0.397501	1.0535	HCR	LCR	Heat shock 70 kDa protein 1A/1B OS=Rattus norvegicus GN=Hspa1a PE=2 SV=2	4.37218e+07	4.19014e+07	5.11903e+07	3.67568e+07	3.83651e+07	4.18969e+07	4.3035e+07	4.91761e+07	4.18653e+07	4.25073e+07	4.94473e+07	4.77355e+07	4.12809e+07	4.34691e+07	3.58987e+07	3.83651e+07	4.16284e+07	3.60307e+07	4.42479e+07	4.12093e+07	3.86222e+07	4.02856e+07	0	0	0	0	0	0	0	0	0	0	0
VDAC1_RAT	12	12	411.6	0.0111131	1.11854	HCR	LCR	Voltage-dependent anion-selective channel protein 1 OS=Rattus norvegicus GN=Vdac1 PE=1 SV=4	1.7723e+08	1.99415e+08	2.02276e+08	2.1335e+08	1.96362e+08	2.10767e+08	2.1727e+08	2.42704e+08	2.13922e+08	2.20142e+08	2.22186e+08	1.935e+08	1.96462e+08	1.71766e+08	2.08369e+08	1.96362e+08	2.09416e+08	1.81907e+08	2.18382e+08	2.1057e+08	2.00022e+08	1.81019e+08	0	0	0	0	0	0	0	0	0	0	0	x
ECHB_RAT	8	8	312.76	0.0779475	1.08214	HCR	LCR	Trifunctional enzyme subunit beta, mitochondrial OS=Rattus norvegicus GN=Hadhb PE=1 SV=1	1.45527e+08	1.48651e+08	1.52333e+08	1.43286e+08	1.45405e+08	1.60967e+08	1.80392e+08	1.62562e+08	1.51441e+08	1.58658e+08	1.4069e+08	1.58886e+08	1.4645e+08	1.29356e+08	1.3994e+08	1.45405e+08	1.59936e+08	1.51032e+08	1.46271e+08	1.49068e+08	1.44157e+08	1.14623e+08	0	0	0	0	0	0	0	0	0	0	0
ACADL_RAT	10	10	541.49	0.0728474	1.12479	HCR	LCR	Long-chain specific acyl-CoA dehydrogenase, mitochondrial OS=Rattus norvegicus GN=Acadl PE=1 SV=1	2.64288e+08	2.92755e+08	2.81529e+08	2.71599e+08	2.42714e+08	2.79212e+08	2.86793e+08	3.28966e+08	2.7267e+08	2.97894e+08	3.60516e+08	2.8855e+08	2.8842e+08	2.39065e+08	2.65258e+08	2.42714e+08	2.77423e+08	2.40115e+08	2.95999e+08	2.68398e+08	2.70667e+08	2.93719e+08	0	0	0	0	0	0	0	0	0	0	0
QCR1_RAT	11	11	322.07	0.0273652	1.10361	HCR	LCR	Cytochrome b-c1 complex subunit 1, mitochondrial OS=Rattus norvegicus GN=Uqcrc1 PE=1 SV=1	9.61638e+07	1.16017e+08	1.16569e+08	1.06077e+08	1.14546e+08	1.20133e+08	1.22912e+08	1.23297e+08	1.19148e+08	1.2859e+08	1.13473e+08	1.04992e+08	1.14299e+08	9.89869e+07	1.036e+08	1.14546e+08	1.19364e+08	1.02907e+08	1.10941e+08	1.17281e+08	1.16837e+08	9.24484e+07	0	0	0	0	0	0	0	0	0	0	0	x
CH60_RAT	12	12	261.36	0.186876	1.04064	HCR	LCR	60 kDa heat shock protein, mitochondrial OS=Rattus norvegicus GN=Hspd1 PE=1 SV=1	1.04455e+08	1.14598e+08	1.17988e+08	1.12119e+08	1.19013e+08	1.13746e+08	1.2257e+08	1.25017e+08	1.14958e+08	1.19749e+08	1.13479e+08	1.14044e+08	1.12901e+08	1.00192e+08	1.09502e+08	1.19013e+08	1.13018e+08	1.02621e+08	1.12489e+08	1.13156e+08	1.08804e+08	9.24535e+07	0	0	0	0	0	0	0	0	0	0	0
GRP75_RAT	9	9	228.91	0.637151	1.02326	HCR	LCR	Stress-70 protein, mitochondrial OS=Rattus norvegicus GN=Hspa9 PE=1 SV=3	7.32859e+07	7.55482e+07	8.47238e+07	7.05479e+07	7.07071e+07	7.5184e+07	7.44402e+07	8.35395e+07	6.73659e+07	7.71784e+07	8.25306e+07	8.00135e+07	7.44294e+07	7.19447e+07	6.89008e+07	7.07071e+07	7.47022e+07	6.23243e+07	7.51676e+07	6.63103e+07	7.01245e+07	6.72393e+07	0	0	0	0	0	0	0	0	0	0	0
AATC_RAT	9	9	503.73	0.503931	1.04911	HCR	LCR	Aspartate aminotransferase, cytoplasmic OS=Rattus norvegicus GN=Got1 PE=1 SV=3	2.03801e+08	2.23559e+08	1.91158e+08	1.94632e+08	1.92466e+08	1.85304e+08	2.13279e+08	2.28966e+08	1.77307e+08	2.14986e+08	2.46155e+08	2.2251e+08	2.20248e+08	1.62325e+08	1.90088e+08	1.92466e+08	1.84117e+08	1.78566e+08	2.06021e+08	1.74529e+08	1.95337e+08	2.00547e+08	0	0	0	0	0	0	0	0	0	0	0
G3P_RAT;G3PT_RAT	14	14	884.55	0.487898	1.07369	HCR	LCR	Glyceraldehyde-3-phosphate dehydrogenase OS=Rattus norvegicus GN=Gapdh PE=1 SV=3	9.79086e+08	1.03119e+09	1.26042e+09	1.11168e+09	9.53405e+08	9.37397e+08	1.0709e+09	1.19128e+09	1.02135e+09	1.127e+09	1.52684e+09	1.06897e+09	1.01592e+09	1.07031e+09	1.08573e+09	9.53405e+08	9.3139e+08	8.96598e+08	1.0719e+09	1.00534e+09	1.02399e+09	1.24395e+09	0	0	0	0	0	0	0	0	0	0	0
MYG_RAT	10	10	709.77	0.20066	1.11621	HCR	LCR	Myoglobin OS=Rattus norvegicus GN=Mb PE=1 SV=3	1.5844e+09	2.41555e+09	2.5333e+09	1.99285e+09	1.99153e+09	2.17959e+09	2.31666e+09	2.43637e+09	2.05101e+09	2.40218e+09	2.70205e+09	1.72985e+09	2.37978e+09	2.15119e+09	1.94632e+09	1.99153e+09	2.16563e+09	1.9396e+09	2.19221e+09	2.01887e+09	2.18263e+09	2.20141e+09	0	0	0	0	0	0	0	0	0	0	0
HBA_RAT	8	8	477.69	0.345917	1.15234	HCR	LCR	Hemoglobin subunit alpha-1/2 OS=Rattus norvegicus GN=Hba1 PE=1 SV=3	1.23441e+09	8.04661e+08	8.50511e+08	5.95793e+08	5.09834e+08	6.74702e+08	1.09163e+09	7.3275e+08	8.48385e+08	1.02596e+09	1.15117e+09	1.34773e+09	7.92745e+08	7.22226e+08	5.81882e+08	5.09834e+08	6.70378e+08	9.13957e+08	6.59317e+08	8.35092e+08	9.32191e+08	9.3788e+08	0	0	0	0	0	0	0	0	0	0	0
ADT1_RAT	10	10	562.13	0.0232357	1.15593	HCR	LCR	ADP/ATP translocase 1 OS=Rattus norvegicus GN=Slc25a4 PE=1 SV=3	4.02172e+08	4.95809e+08	4.91252e+08	4.84246e+08	4.14267e+08	4.7505e+08	5.27556e+08	5.8599e+08	4.91713e+08	5.42975e+08	5.50071e+08	4.39092e+08	4.88467e+08	4.17155e+08	4.7294e+08	4.14267e+08	4.72006e+08	4.41691e+08	5.27265e+08	4.84009e+08	4.93349e+08	4.48153e+08	0	0	0	0	0	0	0	0	0	0	0	x
ACTN4_RAT	8	2	247.42	0.265644	1.08749	HCR	LCR	Alpha-actinin-4 OS=Rattus norvegicus GN=Actn4 PE=1 SV=2	7.34474e+07	8.26928e+07	9.03532e+07	6.4178e+07	7.59874e+07	7.86291e+07	8.32639e+07	8.18113e+07	7.33109e+07	8.59139e+07	1.01656e+08	8.01899e+07	8.14682e+07	7.6725e+07	6.26796e+07	7.59874e+07	7.81253e+07	6.97119e+07	7.36126e+07	7.21622e+07	7.80616e+07	8.28213e+07	0	0	0	0	0	0	0	0	0	0	0
ENOA_RAT	13	5	525.5	0.101065	1.10422	HCR	LCR	Alpha-enolase OS=Rattus norvegicus GN=Eno1 PE=1 SV=4	6.4165e+07	7.1454e+07	7.27226e+07	5.75489e+07	6.20834e+07	6.89697e+07	7.71936e+07	7.56614e+07	6.3827e+07	6.93221e+07	7.96113e+07	7.00554e+07	7.03959e+07	6.17536e+07	5.62053e+07	6.20834e+07	6.85278e+07	6.46296e+07	6.8079e+07	6.28269e+07	6.29862e+07	6.48609e+07	0	0	0	0	0	0	0	0	0	0	0
TBB3_RAT	9	0	313.61			---	---	Tubulin beta-3 chain OS=Rattus norvegicus GN=Tubb3 PE=1 SV=1												0	0	0	0	0	0	0	0	0	0	0	0	0	0	0	0	0	0	0	0	0	0
ACTN1_RAT	9	3	365.29	0.999007	1.00057	HCR	LCR	Alpha-actinin-1 OS=Rattus norvegicus GN=Actn1 PE=1 SV=1	9.41685e+07	1.1008e+08	1.08346e+08	1.00998e+08	1.09299e+08	1.09513e+08	1.11182e+08	1.01186e+08	1.00908e+08	1.12318e+08	9.27201e+07	1.02813e+08	1.0845e+08	9.20035e+07	9.86398e+07	1.09299e+08	1.08811e+08	9.30861e+07	9.10459e+07	9.93271e+07	1.02052e+08	7.55408e+07	0	0	0	0	0	0	0	0	0	0	0
G6PI_RAT	6	6	316.25	0.656911	1.03214	HCR	LCR	Glucose-6-phosphate isomerase OS=Rattus norvegicus GN=Gpi PE=1 SV=1	7.27575e+07	7.31382e+07	7.15396e+07	7.56768e+07	7.35043e+07	7.18638e+07	6.46043e+07	7.66856e+07	7.29218e+07	7.45422e+07	9.34608e+07	7.94366e+07	7.20551e+07	6.0749e+07	7.39099e+07	7.35043e+07	7.14033e+07	5.40893e+07	6.90005e+07	7.17792e+07	6.77292e+07	7.61443e+07	0	0	0	0	0	0	0	0	0	0	0
LDHA_RAT	10	7	342.94	0.503753	1.0458	LCR	HCR	L-lactate dehydrogenase A chain OS=Rattus norvegicus GN=Ldha PE=1 SV=1	1.05239e+08	1.27355e+08	1.38366e+08	1.35395e+08	1.18226e+08	1.04911e+08	1.08876e+08	1.30531e+08	1.18263e+08	1.19241e+08	1.34852e+08	1.149e+08	1.25469e+08	1.17496e+08	1.32234e+08	1.18226e+08	1.04238e+08	9.11557e+07	1.17449e+08	1.1641e+08	1.08342e+08	1.09866e+08	0	0	0	0	0	0	0	0	0	0	0
MYL1_RAT	7	7	363.88	0.359555	1.15885	LCR	HCR	Myosin light chain 1/3, skeletal muscle isoform OS=Rattus norvegicus GN=Myl1 PE=1 SV=2	7.51578e+07	1.04085e+08	1.28225e+08	9.63312e+07	1.45868e+08	9.18983e+07	1.06984e+08	8.18681e+07	1.11959e+08	1.13953e+08	6.25247e+07	8.20573e+07	1.02544e+08	1.08885e+08	9.40821e+07	1.45868e+08	9.13094e+07	8.95716e+07	7.36637e+07	1.10205e+08	1.03538e+08	5.094e+07	0	0	0	0	0	0	0	0	0	0	0
KBTBA_RAT	6	6	249.44	0.396986	1.03698	LCR	HCR	Kelch repeat and BTB domain-containing protein 10 OS=Rattus norvegicus GN=Kbtbd10 PE=1 SV=1	9.35014e+07	8.51727e+07	1.03507e+08	8.7061e+07	8.5173e+07	9.09053e+07	9.30941e+07	8.55386e+07	8.47695e+07	8.42489e+07	8.7294e+07	1.02085e+08	8.39114e+07	8.7895e+07	8.50283e+07	8.5173e+07	9.03228e+07	7.79422e+07	7.69664e+07	8.34412e+07	7.65487e+07	7.11201e+07	0	0	0	0	0	0	0	0	0	0	0
ETFA_RAT	8	8	294.91	0.0994415	1.09808	HCR	LCR	Electron transfer flavoprotein subunit alpha, mitochondrial OS=Rattus norvegicus GN=Etfa PE=1 SV=4	1.29545e+08	1.44905e+08	1.41081e+08	1.396e+08	1.21942e+08	1.36408e+08	1.39532e+08	1.54084e+08	1.39273e+08	1.48983e+08	1.73894e+08	1.41438e+08	1.4276e+08	1.19802e+08	1.36341e+08	1.21942e+08	1.35534e+08	1.16822e+08	1.38643e+08	1.37091e+08	1.35366e+08	1.41675e+08	0	0	0	0	0	0	0	0	0	0	0
NDUS1_RAT	8	8	264.63	0.303354	1.05801	HCR	LCR	NADH-ubiquinone oxidoreductase 75 kDa subunit, mitochondrial OS=Rattus norvegicus GN=Ndufs1 PE=1 SV=1	3.08122e+07	3.69258e+07	3.52076e+07	3.03293e+07	3.1605e+07	3.40108e+07	3.2297e+07	4.05934e+07	3.45076e+07	3.54857e+07	3.24392e+07	3.36408e+07	3.6379e+07	2.98971e+07	2.96212e+07	3.1605e+07	3.37929e+07	2.70403e+07	3.65254e+07	3.39669e+07	3.22424e+07	2.64289e+07	0	0	0	0	0	0	0	0	0	0	0
PYGB_RAT	5	5	118.17	0.906899	1.0129	LCR	HCR	Glycogen phosphorylase, brain form (Fragment) OS=Rattus norvegicus GN=Pygb PE=1 SV=3	5.57457e+07	6.33514e+07	8.53165e+07	6.99835e+07	6.49366e+07	5.64492e+07	6.33243e+07	8.14571e+07	6.72713e+07	5.97303e+07	7.37815e+07	6.08631e+07	6.24132e+07	7.24479e+07	6.83496e+07	6.49366e+07	5.60875e+07	5.30177e+07	7.32939e+07	6.62172e+07	5.42711e+07	6.01112e+07	0	0	0	0	0	0	0	0	0	0	0
ALDOC_RAT	3	3	105.96	0.962444	1.00496	HCR	LCR	Fructose-bisphosphate aldolase C OS=Rattus norvegicus GN=Aldoc PE=1 SV=3	6.64236e+07	1.10895e+08	1.0155e+08	8.54447e+07	8.13574e+07	7.13179e+07	7.74287e+07	9.56157e+07	8.10896e+07	9.14228e+07	1.20582e+08	7.25213e+07	1.09253e+08	8.62331e+07	8.34497e+07	8.13574e+07	7.08609e+07	6.48265e+07	8.60336e+07	7.9819e+07	8.30669e+07	9.82404e+07	0	0	0	0	0	0	0	0	0	0	0
K6PF_RAT	7	7	171.88	0.25459	1.05372	LCR	HCR	6-phosphofructokinase, muscle type OS=Rattus norvegicus GN=Pfkm PE=2 SV=3	4.80055e+07	4.85747e+07	5.52208e+07	4.96157e+07	4.84197e+07	4.44905e+07	5.226e+07	5.07338e+07	4.47471e+07	4.26676e+07	4.96214e+07	5.24124e+07	4.78553e+07	4.68917e+07	4.84573e+07	4.84197e+07	4.42054e+07	4.37542e+07	4.56495e+07	4.4046e+07	3.87679e+07	4.04275e+07	0	0	0	0	0	0	0	0	0	0	0
HS90A_RAT	3	1	127.28	0.571642	1.07486	HCR	LCR	Heat shock protein HSP 90-alpha OS=Rattus norvegicus GN=Hsp90aa1 PE=1 SV=3	9.1988e+06	9.81976e+06	1.11978e+07	1.03991e+07	8.40996e+06	9.4426e+06	7.29522e+06	1.28122e+07	1.0762e+07	1.05324e+07	1.23904e+07	1.00432e+07	9.67435e+06	9.50884e+06	1.01563e+07	8.40996e+06	9.3821e+06	6.10785e+06	1.15282e+07	1.05933e+07	9.5698e+06	1.00947e+07	0	0	0	0	0	0	0	0	0	0	0
PRDX5_RAT	6	6	178.47	0.272585	1.05911	HCR	LCR	Peroxiredoxin-5, mitochondrial OS=Rattus norvegicus GN=Prdx5 PE=1 SV=1	8.28153e+07	9.36471e+07	8.89515e+07	8.595e+07	7.9991e+07	8.48143e+07	9.21339e+07	9.60109e+07	8.12993e+07	8.93681e+07	1.04597e+08	9.04178e+07	9.22604e+07	7.55347e+07	8.39433e+07	7.9991e+07	8.42708e+07	7.71383e+07	8.63892e+07	8.00254e+07	8.12001e+07	8.52175e+07	0	0	0	0	0	0	0	0	0	0	0
ACADV_RAT	7	7	204.93	0.759247	1.02766	HCR	LCR	Very long-chain specific acyl-CoA dehydrogenase, mitochondrial OS=Rattus norvegicus GN=Acadvl PE=1 SV=1	1.31838e+08	1.54382e+08	1.63033e+08	1.33801e+08	1.49727e+08	1.57741e+08	1.79187e+08	1.54241e+08	1.35266e+08	1.56603e+08	1.2062e+08	1.43941e+08	1.52096e+08	1.38442e+08	1.30677e+08	1.49727e+08	1.5673e+08	1.50023e+08	1.38784e+08	1.33146e+08	1.42289e+08	9.82715e+07	0	0	0	0	0	0	0	0	0	0	0
HSPB1_RAT	7	7	246.93	0.877997	1.00742	HCR	LCR	Heat shock protein beta-1 OS=Rattus norvegicus GN=Hspb1 PE=1 SV=1	1.4788e+08	1.06265e+08	1.58296e+08	1.29463e+08	1.05827e+08	1.23319e+08	1.30284e+08	1.36718e+08	1.21817e+08	1.11492e+08	1.59415e+08	1.61455e+08	1.04691e+08	1.3442e+08	1.2644e+08	1.05827e+08	1.22528e+08	1.09079e+08	1.23017e+08	1.19908e+08	1.01301e+08	1.29878e+08	0	0	0	0	0	0	0	0	0	0	0
AT2A3_RAT	4	0	344.31			---	---	Sarcoplasmic/endoplasmic reticulum calcium ATPase 3 OS=Rattus norvegicus GN=Atp2a3 PE=1 SV=1												0	0	0	0	0	0	0	0	0	0	0	0	0	0	0	0	0	0	0	0	0	0
HSP72_RAT	6	1	290.07	0.940141	1.00222	LCR	HCR	Heat shock-related 70 kDa protein 2 OS=Rattus norvegicus GN=Hspa2 PE=2 SV=2	1.52751e+07	1.53162e+07	1.72157e+07	1.39645e+07	1.8528e+07	1.80069e+07	1.74699e+07	1.63561e+07	1.61034e+07	1.64478e+07	1.17618e+07	1.66773e+07	1.50894e+07	1.4619e+07	1.36385e+07	1.8528e+07	1.78915e+07	1.46265e+07	1.4717e+07	1.58511e+07	1.49445e+07	9.58259e+06	0	0	0	0	0	0	0	0	0	0	0
SCOT1_RAT	6	6	135.65	0.593545	1.02526	HCR	LCR	Succinyl-CoA:3-ketoacid-coenzyme A transferase 1, mitochondrial OS=Rattus norvegicus GN=Oxct1 PE=1 SV=1	1.30987e+08	1.30676e+08	1.38257e+08	1.33884e+08	1.30275e+08	1.29316e+08	1.44396e+08	1.31532e+08	1.25111e+08	1.29859e+08	1.56812e+08	1.43012e+08	1.28741e+08	1.17403e+08	1.30758e+08	1.30275e+08	1.28488e+08	1.20894e+08	1.1835e+08	1.23151e+08	1.1799e+08	1.27758e+08	0	0	0	0	0	0	0	0	0	0	0
ODPB_RAT	7	7	257.44	0.243979	1.05257	HCR	LCR	Pyruvate dehydrogenase E1 component subunit beta, mitochondrial OS=Rattus norvegicus GN=Pdhb PE=1 SV=2	5.93024e+07	5.97205e+07	6.40416e+07	6.5897e+07	5.8951e+07	6.21255e+07	6.42861e+07	7.01936e+07	6.01883e+07	6.04095e+07	7.17176e+07	6.47464e+07	5.88361e+07	5.4382e+07	6.43585e+07	5.8951e+07	6.17274e+07	5.3823e+07	6.31592e+07	5.92452e+07	5.48882e+07	5.84297e+07	0	0	0	0	0	0	0	0	0	0	0
ETFB_RAT	8	8	279.27	0.0321052	1.13077	HCR	LCR	Electron transfer flavoprotein subunit beta OS=Rattus norvegicus GN=Etfb PE=2 SV=3	1.0335e+08	1.17297e+08	1.24118e+08	1.15839e+08	1.05529e+08	1.15629e+08	1.31151e+08	1.40448e+08	1.15877e+08	1.28204e+08	1.36895e+08	1.12838e+08	1.1556e+08	1.05397e+08	1.13134e+08	1.05529e+08	1.14888e+08	1.09805e+08	1.26373e+08	1.14061e+08	1.16486e+08	1.11531e+08	0	0	0	0	0	0	0	0	0	0	0	x
TBA3_RAT	7	1	222.77	0.856131	1.01257	HCR	LCR	Tubulin alpha-3 chain OS=Rattus norvegicus GN=Tuba3a PE=2 SV=1	1.65214e+07	1.56e+07	1.61446e+07	1.33184e+07	1.57902e+07	1.60461e+07	1.77925e+07	1.49548e+07	1.38903e+07	1.40951e+07	1.72379e+07	1.8038e+07	1.53689e+07	1.37094e+07	1.30074e+07	1.57902e+07	1.59432e+07	1.48966e+07	1.34561e+07	1.36727e+07	1.28068e+07	1.4044e+07	0	0	0	0	0	0	0	0	0	0	0
TPM3_RAT	6	2	434.1	0.66574	1.10887	HCR	LCR	Tropomyosin alpha-3 chain OS=Rattus norvegicus GN=Tpm3 PE=1 SV=2	7.35587e+07	5.96778e+07	6.66697e+07	5.79114e+07	8.91704e+07	1.00658e+08	1.08207e+08	7.29222e+07	7.36882e+07	6.19737e+07	4.42665e+07	8.03114e+07	5.87941e+07	5.66137e+07	5.65593e+07	8.91704e+07	1.00013e+08	9.05957e+07	6.56143e+07	7.25335e+07	5.63095e+07	3.60648e+07	0	0	0	0	0	0	0	0	0	0	0
FABPH_RAT	7	7	348.73	0.00637915	1.53618	HCR	LCR	Fatty acid-binding protein, heart OS=Rattus norvegicus GN=Fabp3 PE=1 SV=2	2.99455e+08	4.12848e+08	3.73236e+08	2.60426e+08	2.97619e+08	4.53406e+08	4.41546e+08	5.31382e+08	4.1092e+08	4.6404e+08	7.28525e+08	3.26945e+08	4.06734e+08	3.1694e+08	2.54346e+08	2.97619e+08	4.505e+08	3.6968e+08	4.7813e+08	4.04482e+08	4.21627e+08	5.93543e+08	0	0	0	0	0	0	0	0	0	0	0	x
IDH3A_RAT	4	4	184.45	0.950848	1.00302	HCR	LCR	Isocitrate dehydrogenase [NAD] subunit alpha, mitochondrial OS=Rattus norvegicus GN=Idh3a PE=1 SV=1	3.59265e+07	3.53541e+07	3.5635e+07	4.09957e+07	3.39832e+07	3.2573e+07	3.56052e+07	3.91307e+07	3.63255e+07	3.53432e+07	3.99549e+07	3.92245e+07	3.48305e+07	3.026e+07	4.00385e+07	3.39832e+07	3.23642e+07	2.98101e+07	3.52092e+07	3.57563e+07	3.21129e+07	3.2552e+07	0	0	0	0	0	0	0	0	0	0	0
MLRS_RAT	10	10	321.46	0.47821	1.12028	LCR	HCR	Myosin regulatory light chain 2, skeletal muscle isoform OS=Rattus norvegicus GN=Mylpf PE=2 SV=2	7.16246e+07	1.02262e+08	9.87612e+07	9.82693e+07	1.47631e+08	8.60189e+07	9.01704e+07	8.09367e+07	1.18831e+08	1.1524e+08	6.42496e+07	7.81997e+07	1.00748e+08	8.38647e+07	9.5975e+07	1.47631e+08	8.54677e+07	7.54943e+07	7.28257e+07	1.16969e+08	1.04707e+08	5.23454e+07	0	0	0	0	0	0	0	0	0	0	0
ODFP2_RAT	5	2	78.39	0.694144	1.03121	HCR	LCR	Outer dense fiber protein 2 OS=Rattus norvegicus GN=Odf2 PE=1 SV=2	3.99095e+07	3.22629e+07	4.77341e+07	3.15068e+07	2.77866e+07	3.68962e+07	3.80124e+07	3.99474e+07	3.24305e+07	3.07729e+07	4.3691e+07	4.35732e+07	3.17851e+07	4.05342e+07	3.07712e+07	2.77866e+07	3.66598e+07	3.18255e+07	3.59441e+07	3.19224e+07	2.79603e+07	3.55959e+07	0	0	0	0	0	0	0	0	0	0	0
ADCK3_RAT	2	2	78.85	0.672934	1.04372	HCR	LCR	Chaperone activity of bc1 complex-like, mitochondrial OS=Rattus norvegicus GN=Adck3 PE=2 SV=1	1.93382e+07	1.72861e+07	2.27647e+07	1.76249e+07	1.72505e+07	1.7102e+07	2.32689e+07	2.28805e+07	1.70513e+07	1.64504e+07	2.13094e+07	2.11134e+07	1.70301e+07	1.9331e+07	1.72134e+07	1.72505e+07	1.69924e+07	1.94817e+07	2.05875e+07	1.67841e+07	1.49468e+07	1.73612e+07	0	0	0	0	0	0	0	0	0	0	0
ECI1_RAT	5	5	148.12	0.0609505	1.14395	HCR	LCR	Enoyl-CoA delta isomerase 1, mitochondrial OS=Rattus norvegicus GN=Eci1 PE=1 SV=1	4.70481e+07	5.40093e+07	6.19786e+07	5.14181e+07	5.23559e+07	6.22522e+07	5.00897e+07	6.74776e+07	5.92769e+07	6.12675e+07	6.58955e+07	5.13671e+07	5.32095e+07	5.26301e+07	5.02176e+07	5.23559e+07	6.18533e+07	4.19372e+07	6.07154e+07	5.83481e+07	5.56678e+07	5.36863e+07	0	0	0	0	0	0	0	0	0	0	0
ALDH2_RAT	4	4	100.62	0.944406	1.00216	HCR	LCR	Aldehyde dehydrogenase, mitochondrial OS=Rattus norvegicus GN=Aldh2 PE=1 SV=1	4.47248e+07	4.62147e+07	5.06567e+07	4.81523e+07	4.20212e+07	4.55005e+07	4.56848e+07	4.85953e+07	4.19776e+07	4.79193e+07	4.90476e+07	4.88306e+07	4.55304e+07	4.30159e+07	4.70281e+07	4.20212e+07	4.52089e+07	3.82492e+07	4.37254e+07	4.13198e+07	4.35396e+07	3.996e+07	0	0	0	0	0	0	0	0	0	0	0
EF1A2_RAT	7	7	193.47	0.810322	1.01748	LCR	HCR	Elongation factor 1-alpha 2 OS=Rattus norvegicus GN=Eef1a2 PE=2 SV=1	9.65191e+07	1.11896e+08	1.20173e+08	1.01794e+08	8.83335e+07	9.93846e+07	7.84741e+07	1.09192e+08	9.44788e+07	1.08521e+08	1.21712e+08	1.0538e+08	1.10239e+08	1.02047e+08	9.9417e+07	8.83335e+07	9.87478e+07	6.57017e+07	9.82492e+07	9.29984e+07	9.86028e+07	9.91613e+07	0	0	0	0	0	0	0	0	0	0	0
TNNT1_RAT	9	9	300.17	0.859544	1.03306	HCR	LCR	Troponin T, slow skeletal muscle OS=Rattus norvegicus GN=Tnnt1 PE=2 SV=3	1.73539e+08	1.9949e+08	2.10579e+08	1.64415e+08	2.19111e+08	2.41911e+08	2.42494e+08	1.81517e+08	1.9328e+08	2.04378e+08	1.35345e+08	1.8947e+08	1.96536e+08	1.78816e+08	1.60577e+08	2.19111e+08	2.40361e+08	2.03026e+08	1.63326e+08	1.90251e+08	1.85698e+08	1.10268e+08	0	0	0	0	0	0	0	0	0	0	0
PEBP1_RAT	13	13	405.92	0.258348	1.09369	HCR	LCR	Phosphatidylethanolamine-binding protein 1 OS=Rattus norvegicus GN=Pebp1 PE=1 SV=3	2.39098e+08	2.42837e+08	2.53001e+08	2.35256e+08	2.14004e+08	2.40681e+08	2.48487e+08	2.6012e+08	2.20979e+08	2.49217e+08	3.34682e+08	2.61047e+08	2.39241e+08	2.1484e+08	2.29763e+08	2.14004e+08	2.39138e+08	2.08043e+08	2.34052e+08	2.17516e+08	2.26439e+08	2.72672e+08	0	0	0	0	0	0	0	0	0	0	0
GSTM4_RAT	5	5	106.77	0.154638	1.16635	HCR	LCR	Glutathione S-transferase Yb-3 OS=Rattus norvegicus GN=Gstm3 PE=1 SV=2	5.67406e+07	5.58647e+07	6.41036e+07	5.48875e+07	5.40734e+07	5.91886e+07	6.06459e+07	8.19695e+07	5.75764e+07	5.52429e+07	8.52068e+07	6.19494e+07	5.50374e+07	5.44346e+07	5.3606e+07	5.40734e+07	5.88093e+07	5.07752e+07	7.37549e+07	5.66742e+07	5.01938e+07	6.94196e+07	0	0	0	0	0	0	0	0	0	0	0
1433E_RAT;1433T_RAT	5	3	235.98	0.257774	1.07896	HCR	LCR	14-3-3 protein epsilon OS=Rattus norvegicus GN=Ywhae PE=1 SV=1	3.47837e+07	3.79619e+07	4.32743e+07	3.75543e+07	3.23154e+07	3.65255e+07	3.9443e+07	4.00921e+07	3.6408e+07	4.01967e+07	4.80145e+07	3.79768e+07	3.73998e+07	3.67471e+07	3.66775e+07	3.23154e+07	3.62915e+07	3.30233e+07	3.60742e+07	3.58376e+07	3.65228e+07	3.91183e+07	0	0	0	0	0	0	0	0	0	0	0
DHE3_RAT	4	4	99.09	0.143363	1.16434	LCR	HCR	Glutamate dehydrogenase 1, mitochondrial OS=Rattus norvegicus GN=Glud1 PE=1 SV=2	3.22626e+07	3.19144e+07	2.99796e+07	3.29066e+07	3.55003e+07	2.93171e+07	2.91214e+07	2.71762e+07	3.42313e+07	3.01044e+07	1.75913e+07	3.52243e+07	3.14418e+07	2.54577e+07	3.21383e+07	3.55003e+07	2.91293e+07	2.43816e+07	2.44527e+07	3.36949e+07	2.73529e+07	1.4332e+07	0	0	0	0	0	0	0	0	0	0	0
AT1A2_RAT;ATP4A_RAT	3	3	110.85	0.115479	1.19359	HCR	LCR	Sodium/potassium-transporting ATPase subunit alpha-2 OS=Rattus norvegicus GN=Atp1a2 PE=1 SV=1	7.58471e+06	8.50031e+06	1.09819e+07	6.56631e+06	7.01998e+06	8.86164e+06	1.11899e+07	1.06174e+07	8.22713e+06	8.16776e+06	1.1164e+07	8.28099e+06	8.37444e+06	9.32543e+06	6.413e+06	7.01998e+06	8.80485e+06	9.36866e+06	9.55339e+06	8.09821e+06	7.42125e+06	9.09548e+06	0	0	0	0	0	0	0	0	0	0	0
ECHA_RAT	5	5	212.13	0.0830777	1.0973	HCR	LCR	Trifunctional enzyme subunit alpha, mitochondrial OS=Rattus norvegicus GN=Hadha PE=1 SV=2	3.16018e+07	3.81577e+07	3.84844e+07	3.77205e+07	3.15415e+07	3.86082e+07	4.16044e+07	4.12614e+07	3.57116e+07	3.769e+07	3.88564e+07	3.45029e+07	3.75927e+07	3.26797e+07	3.68399e+07	3.15415e+07	3.83608e+07	3.48329e+07	3.71264e+07	3.51521e+07	3.42452e+07	3.16571e+07	0	0	0	0	0	0	0	0	0	0	0
UBA1_RAT	3	3	85.73	0.358937	1.06291	HCR	LCR	Ubiquitin-like modifier-activating enzyme 1 OS=Rattus norvegicus GN=Uba1 PE=1 SV=1	1.46705e+07	1.47114e+07	1.65067e+07	1.39793e+07	1.30546e+07	1.34611e+07	1.67523e+07	1.64124e+07	1.35544e+07	1.53473e+07	1.74848e+07	1.60172e+07	1.44936e+07	1.40169e+07	1.36529e+07	1.30546e+07	1.33748e+07	1.40257e+07	1.47676e+07	1.33421e+07	1.39446e+07	1.42452e+07	0	0	0	0	0	0	0	0	0	0	0
HEMO_RAT	5	5	137.37	0.501587	1.03308	LCR	HCR	Hemopexin OS=Rattus norvegicus GN=Hpx PE=1 SV=3	7.63707e+07	7.56121e+07	8.68149e+07	8.16928e+07	7.31831e+07	7.14206e+07	7.69841e+07	8.3617e+07	7.2245e+07	6.83376e+07	8.46779e+07	8.33815e+07	7.44924e+07	7.37203e+07	7.97855e+07	7.31831e+07	7.0963e+07	6.44542e+07	7.52373e+07	7.1113e+07	6.20916e+07	6.89887e+07	0	0	0	0	0	0	0	0	0	0	0
EF2_RAT	7	7	171.74	0.805715	1.01601	HCR	LCR	Elongation factor 2 OS=Rattus norvegicus GN=Eef2 PE=1 SV=4	1.0307e+08	9.95666e+07	1.07312e+08	1.06049e+08	9.53473e+07	9.57381e+07	1.01766e+08	1.04528e+08	9.47478e+07	1.01665e+08	1.24994e+08	1.12532e+08	9.80921e+07	9.11256e+07	1.03573e+08	9.53473e+07	9.51246e+07	8.5203e+07	9.40529e+07	9.32632e+07	9.23726e+07	1.01835e+08	0	0	0	0	0	0	0	0	0	0	0
THIM_RAT	7	7	395.98	0.00714497	1.25409	HCR	LCR	3-ketoacyl-CoA thiolase, mitochondrial OS=Rattus norvegicus GN=Acaa2 PE=1 SV=1	8.33097e+07	9.88737e+07	1.00759e+08	8.73888e+07	7.57388e+07	1.01586e+08	1.07809e+08	1.19282e+08	1.01788e+08	1.09686e+08	1.31145e+08	9.09576e+07	9.74095e+07	8.55608e+07	8.53485e+07	7.57388e+07	1.00935e+08	9.0262e+07	1.07328e+08	1.00193e+08	9.96606e+07	1.06846e+08	0	0	0	0	0	0	0	0	0	0	0	x
PRDX1_RAT	7	7	153.65	0.248407	1.05763	HCR	LCR	Peroxiredoxin-1 OS=Rattus norvegicus GN=Prdx1 PE=1 SV=1	8.29218e+07	9.37656e+07	9.91566e+07	8.92892e+07	8.64142e+07	9.22746e+07	9.64348e+07	9.15212e+07	8.85329e+07	9.39498e+07	1.10369e+08	9.0534e+07	9.23771e+07	8.42004e+07	8.72045e+07	8.64142e+07	9.16834e+07	8.07391e+07	8.23494e+07	8.71456e+07	8.5363e+07	8.99197e+07	0	0	0	0	0	0	0	0	0	0	0
FUMH_RAT	7	7	328.11	0.0734139	1.1075	HCR	LCR	Fumarate hydratase, mitochondrial OS=Rattus norvegicus GN=Fh PE=1 SV=1	9.13898e+07	9.86222e+07	1.17809e+08	1.07121e+08	1.00718e+08	1.09189e+08	1.05868e+08	1.20353e+08	1.06317e+08	1.16277e+08	1.27309e+08	9.97794e+07	9.71617e+07	1.00039e+08	1.0462e+08	1.00718e+08	1.0849e+08	8.86368e+07	1.08292e+08	1.04651e+08	1.05649e+08	1.03721e+08	0	0	0	0	0	0	0	0	0	0	0
CO1A1_RAT	1	1	19.67	0.482566	1.09236	LCR	HCR	Collagen alpha-1(I) chain OS=Rattus norvegicus GN=Col1a1 PE=1 SV=5	7.69221e+06	9.45566e+06	1.05157e+07	8.90355e+06	9.98454e+06	9.71557e+06	1.03588e+07	3.591e+06	9.59924e+06	1.01781e+07	7.69618e+06	8.39836e+06	9.31563e+06	8.9296e+06	8.69567e+06	9.98454e+06	9.65331e+06	8.67281e+06	3.23113e+06	9.44882e+06	9.24781e+06	6.27022e+06	0	0	0	0	0	0	0	0	0	0	0
HS71L_RAT	2	0	196.38			---	---	Heat shock 70 kDa protein 1-like OS=Rattus norvegicus GN=Hspa1l PE=2 SV=2												0	0	0	0	0	0	0	0	0	0	0	0	0	0	0	0	0	0	0	0	0	0
MRCKA_RAT	3	3	55.33	0.678687	1.03304	LCR	HCR	Serine/threonine-protein kinase MRCK alpha OS=Rattus norvegicus GN=Cdc42bpa PE=1 SV=1	1.67537e+07	1.7696e+07	1.38801e+07	1.39155e+07	1.72228e+07	1.71519e+07	1.7883e+07	1.3982e+07	1.5028e+07	1.66894e+07	1.15774e+07	1.82917e+07	1.74339e+07	1.17865e+07	1.35906e+07	1.72228e+07	1.7042e+07	1.49723e+07	1.25808e+07	1.47925e+07	1.5164e+07	9.43233e+06	0	0	0	0	0	0	0	0	0	0	0
CRYAB_RAT	6	6	364.37	0.394548	1.09735	HCR	LCR	Alpha-crystallin B chain OS=Rattus norvegicus GN=Cryab PE=1 SV=1	4.92922e+08	4.17212e+08	5.58438e+08	4.88555e+08	3.14245e+08	5.13065e+08	5.04597e+08	5.60448e+08	3.99201e+08	4.21837e+08	5.91852e+08	5.38172e+08	4.11034e+08	4.74207e+08	4.77148e+08	3.14245e+08	5.09777e+08	4.22469e+08	5.04283e+08	3.92945e+08	3.83282e+08	4.82193e+08	0	0	0	0	0	0	0	0	0	0	0
ADT2_RAT	2	2	24.18	0.668586	1.03928	LCR	HCR	ADP/ATP translocase 2 OS=Rattus norvegicus GN=Slc25a5 PE=1 SV=3	5.80924e+06	5.72588e+06	4.51598e+06	4.25154e+06	4.50042e+06	4.27322e+06	4.06849e+06	5.33475e+06	4.68738e+06	4.68624e+06	5.58856e+06	6.34253e+06	5.64108e+06	3.83482e+06	4.15228e+06	4.50042e+06	4.24584e+06	3.4063e+06	4.80013e+06	4.61393e+06	4.25793e+06	4.55311e+06	0	0	0	0	0	0	0	0	0	0	0
MYL6_RAT	4	4	122.21	0.557644	1.14237	HCR	LCR	Myosin light polypeptide 6 OS=Rattus norvegicus GN=Myl6 PE=1 SV=3	6.48772e+07	8.55957e+07	9.64764e+07	5.46068e+07	7.83409e+07	9.54418e+07	1.26421e+08	8.06899e+07	7.92883e+07	9.3558e+07	4.53812e+07	7.08329e+07	8.43282e+07	8.19246e+07	5.33319e+07	7.83409e+07	9.48302e+07	1.05845e+08	7.26036e+07	7.80459e+07	8.5007e+07	3.69729e+07	0	0	0	0	0	0	0	0	0	0	0
NDKB_RAT	6	6	152.73	0.286819	1.10837	HCR	LCR	Nucleoside diphosphate kinase B OS=Rattus norvegicus GN=Nme2 PE=1 SV=1	1.23333e+08	1.56939e+08	1.63709e+08	1.32226e+08	1.23415e+08	1.35185e+08	1.41631e+08	1.70205e+08	1.33193e+08	1.52073e+08	1.98241e+08	1.34655e+08	1.54615e+08	1.39016e+08	1.29139e+08	1.23415e+08	1.34318e+08	1.18579e+08	1.53148e+08	1.31106e+08	1.38174e+08	1.61511e+08	0	0	0	0	0	0	0	0	0	0	0
PGAM2_RAT	5	5	243.3	0.930952	1.01176	HCR	LCR	Phosphoglycerate mutase 2 OS=Rattus norvegicus GN=Pgam2 PE=2 SV=2	1.46896e+08	1.9094e+08	1.88755e+08	1.75973e+08	1.63161e+08	1.63396e+08	1.47403e+08	1.65366e+08	1.6362e+08	1.87011e+08	2.24287e+08	1.60381e+08	1.88113e+08	1.60284e+08	1.71864e+08	1.63161e+08	1.62349e+08	1.23412e+08	1.48794e+08	1.61056e+08	1.69919e+08	1.82731e+08	0	0	0	0	0	0	0	0	0	0	0
EF1A1_RAT	2	2	75.68	0.941077	1.00171	HCR	LCR	Elongation factor 1-alpha 1 OS=Rattus norvegicus GN=Eef1a1 PE=1 SV=1	5.60346e+07	5.3562e+07	6.33031e+07	5.14187e+07	4.56139e+07	5.04982e+07	5.49333e+07	5.6353e+07	4.80216e+07	5.40213e+07	6.06444e+07	6.11786e+07	5.27688e+07	5.37549e+07	5.02182e+07	4.56139e+07	5.01746e+07	4.59924e+07	5.07056e+07	4.72691e+07	4.90839e+07	4.94081e+07	0	0	0	0	0	0	0	0	0	0	0
VDAC2_RAT	5	5	184.75	0.124803	1.04922	LCR	HCR	Voltage-dependent anion-selective channel protein 2 OS=Rattus norvegicus GN=Vdac2 PE=1 SV=2	4.18324e+07	4.45105e+07	4.37763e+07	4.32143e+07	4.22609e+07	4.14008e+07	3.70593e+07	4.44695e+07	4.24244e+07	4.0512e+07	4.07109e+07	4.56726e+07	4.38513e+07	3.71733e+07	4.22053e+07	4.22609e+07	4.11355e+07	3.10276e+07	4.0013e+07	4.17596e+07	3.68093e+07	3.31679e+07	0	0	0	0	0	0	0	0	0	0	0
ATPG_RAT	4	4	156.74	0.220318	1.08011	HCR	LCR	ATP synthase subunit gamma, mitochondrial OS=Rattus norvegicus GN=Atp5c1 PE=1 SV=2	5.12485e+07	5.28657e+07	6.64346e+07	5.57295e+07	5.07211e+07	5.1305e+07	5.95182e+07	6.65177e+07	5.75485e+07	6.15148e+07	6.26249e+07	5.59532e+07	5.20828e+07	5.64141e+07	5.44284e+07	5.07211e+07	5.09763e+07	4.9831e+07	5.98516e+07	5.66468e+07	5.58925e+07	5.10217e+07	0	0	0	0	0	0	0	0	0	0	0
DLDH_RAT	6	6	184.2	0.00771992	1.15485	HCR	LCR	Dihydrolipoyl dehydrogenase, mitochondrial OS=Rattus norvegicus GN=Dld PE=1 SV=1	5.78868e+07	5.86883e+07	6.29015e+07	5.22454e+07	5.7405e+07	6.32032e+07	7.56574e+07	6.61979e+07	6.26296e+07	6.39364e+07	6.9054e+07	6.32008e+07	5.78192e+07	5.34139e+07	5.10256e+07	5.7405e+07	6.27983e+07	6.33435e+07	5.95639e+07	6.16482e+07	5.80927e+07	5.62596e+07	0	0	0	0	0	0	0	0	0	0	0	x
PDLI5_RAT	5	5	110.62	0.244113	1.13113	HCR	LCR	PDZ and LIM domain protein 5 OS=Rattus norvegicus GN=Pdlim5 PE=1 SV=2	6.22825e+07	7.81766e+07	8.42148e+07	6.35597e+07	8.05044e+07	8.62915e+07	1.07088e+08	8.24564e+07	7.55711e+07	8.52537e+07	6.38474e+07	6.8e+07	7.70189e+07	7.15124e+07	6.20757e+07	8.05044e+07	8.57386e+07	8.96582e+07	7.41931e+07	7.43869e+07	7.74617e+07	5.20177e+07	0	0	0	0	0	0	0	0	0	0	0
COX41_RAT	5	5	158.82	0.0206158	1.15432	HCR	LCR	Cytochrome c oxidase subunit 4 isoform 1, mitochondrial OS=Rattus norvegicus GN=Cox4i1 PE=1 SV=1	6.30375e+07	7.16706e+07	7.13724e+07	7.39557e+07	6.38506e+07	7.29359e+07	7.54306e+07	9.01887e+07	7.16441e+07	8.11376e+07	8.5011e+07	6.88244e+07	7.06093e+07	6.0607e+07	7.22291e+07	6.38506e+07	7.24686e+07	6.31536e+07	8.11505e+07	7.05215e+07	7.37218e+07	6.92601e+07	0	0	0	0	0	0	0	0	0	0	0	x
DHSB_RAT	6	6	153.49	0.89601	1.00929	HCR	LCR	Succinate dehydrogenase [ubiquinone] iron-sulfur subunit, mitochondrial OS=Rattus norvegicus GN=Sdhb PE=2 SV=2	5.65051e+07	4.09445e+07	4.61785e+07	5.26049e+07	4.8988e+07	4.71944e+07	4.61368e+07	4.75162e+07	4.82246e+07	4.60617e+07	6.18654e+07	6.16923e+07	4.03382e+07	3.92133e+07	5.13767e+07	4.8988e+07	4.6892e+07	3.86276e+07	4.27544e+07	4.7469e+07	4.18517e+07	5.04029e+07	0	0	0	0	0	0	0	0	0	0	0
MMSA_RAT	5	5	114.96	0.0234995	1.0546	HCR	LCR	Methylmalonate-semialdehyde dehydrogenase [acylating], mitochondrial OS=Rattus norvegicus GN=Aldh6a1 PE=1 SV=1	5.80166e+07	5.31678e+07	5.68224e+07	5.59916e+07	5.39503e+07	5.86189e+07	6.15659e+07	5.7171e+07	5.73105e+07	5.74987e+07	5.95856e+07	6.33426e+07	5.23804e+07	4.82517e+07	5.46843e+07	5.39503e+07	5.82433e+07	5.15455e+07	5.14416e+07	5.64124e+07	5.22435e+07	4.85455e+07	0	0	0	0	0	0	0	0	0	0	0	x
ODPA_RAT	5	5	176.02	0.74965	1.02009	LCR	HCR	Pyruvate dehydrogenase E1 component subunit alpha, somatic form, mitochondrial OS=Rattus norvegicus GN=Pdha1 PE=1 SV=2	4.93844e+08	5.77577e+08	6.00784e+08	4.98863e+08	6.86915e+08	6.67571e+08	7.04381e+08	5.47324e+08	5.70185e+08	5.98767e+08	2.73816e+08	5.39179e+08	5.69024e+08	5.10165e+08	4.87216e+08	6.86915e+08	6.63294e+08	5.89737e+08	4.92474e+08	5.6125e+08	5.44041e+08	2.23083e+08	0	0	0	0	0	0	0	0	0	0	0
ATPO_RAT	3	3	121.04	0.760923	1.0096	HCR	LCR	ATP synthase subunit O, mitochondrial OS=Rattus norvegicus GN=Atp5o PE=1 SV=1	6.37991e+07	7.04603e+07	7.16506e+07	6.96988e+07	6.54597e+07	6.67752e+07	6.51711e+07	6.89377e+07	6.65285e+07	7.13995e+07	7.43978e+07	6.96558e+07	6.94169e+07	6.08433e+07	6.80715e+07	6.54597e+07	6.63473e+07	5.45639e+07	6.20291e+07	6.5486e+07	6.48738e+07	6.06133e+07	0	0	0	0	0	0	0	0	0	0	0
K2C1B_RAT	2	2	27.57	0.354696	1.08548	LCR	HCR	Keratin, type II cytoskeletal 1b OS=Rattus norvegicus GN=Krt77 PE=2 SV=1	4.20573e+07	5.36899e+07	6.28551e+07	5.25677e+07	6.37536e+07	4.71096e+07	4.79586e+07	5.04245e+07	5.23897e+07	5.69171e+07	4.91296e+07	4.59181e+07	5.28948e+07	5.33744e+07	5.13404e+07	6.37536e+07	4.68077e+07	4.01529e+07	4.53712e+07	5.15688e+07	5.1715e+07	4.00268e+07	0	0	0	0	0	0	0	0	0	0	0
MLRV_RAT	5	5	319.07	0.728234	1.11801	HCR	LCR	Myosin regulatory light chain 2, ventricular/cardiac muscle isoform OS=Rattus norvegicus GN=Myl2 PE=1 SV=2	3.46354e+08	4.03928e+08	4.29549e+08	2.71009e+08	4.75128e+08	5.23219e+08	6.21583e+08	4.14745e+08	3.90715e+08	4.38981e+08	1.94659e+08	3.78149e+08	3.97946e+08	3.64758e+08	2.64681e+08	4.75128e+08	5.19867e+08	5.20414e+08	3.73182e+08	3.84593e+08	3.98859e+08	1.58592e+08	0	0	0	0	0	0	0	0	0	0	0
SCG1_RAT	3	3	40.01	0.862776	1.01313	HCR	LCR	Secretogranin-1 OS=Rattus norvegicus GN=Chgb PE=1 SV=2	7.58181e+07	9.61392e+07	1.05178e+08	8.97488e+07	7.40022e+07	7.80453e+07	8.70439e+07	9.16202e+07	7.70081e+07	9.27596e+07	1.09533e+08	8.27782e+07	9.47155e+07	8.93139e+07	8.76534e+07	7.40022e+07	7.75452e+07	7.28767e+07	8.24385e+07	7.58014e+07	8.42816e+07	8.92388e+07	0	0	0	0	0	0	0	0	0	0	0
UBB_RAT	3	3	173.32	0.42245	1.05926	HCR	LCR	Polyubiquitin-B OS=Rattus norvegicus GN=Ubb PE=1 SV=1	6.17316e+07	6.53176e+07	6.9026e+07	4.73169e+07	5.53429e+07	6.53983e+07	7.1379e+07	6.47555e+07	5.34734e+07	6.07814e+07	6.39381e+07	6.73986e+07	6.43503e+07	5.86146e+07	4.62122e+07	5.53429e+07	6.49792e+07	5.97614e+07	5.8266e+07	5.26355e+07	5.52261e+07	5.20916e+07	0	0	0	0	0	0	0	0	0	0	0
MPCP_RAT	5	5	138.48	0.186557	1.08764	HCR	LCR	Phosphate carrier protein, mitochondrial OS=Rattus norvegicus GN=Slc25a3 PE=1 SV=1	4.82843e+07	5.85186e+07	6.27341e+07	5.08604e+07	4.83582e+07	5.70426e+07	5.9951e+07	5.04257e+07	5.76572e+07	6.38076e+07	6.18886e+07	5.27168e+07	5.76521e+07	5.32717e+07	4.96729e+07	4.83582e+07	5.6677e+07	5.01934e+07	4.53723e+07	5.67537e+07	5.79757e+07	5.04218e+07	0	0	0	0	0	0	0	0	0	0	0
ALDR_RAT	3	3	83.51	0.157067	1.11754	HCR	LCR	Aldose reductase OS=Rattus norvegicus GN=Akr1b1 PE=1 SV=3	4.71107e+07	5.82575e+07	5.99175e+07	5.19794e+07	5.01408e+07	5.39234e+07	5.52855e+07	6.32433e+07	5.26328e+07	5.9786e+07	7.37338e+07	5.14355e+07	5.73948e+07	5.088e+07	5.07658e+07	5.01408e+07	5.35778e+07	4.62872e+07	5.69054e+07	5.1808e+07	5.43217e+07	6.00723e+07	0	0	0	0	0	0	0	0	0	0	0
CSRP3_RAT	6	6	186.14	0.696317	1.0513	LCR	HCR	Cysteine and glycine-rich protein 3 OS=Rattus norvegicus GN=Csrp3 PE=1 SV=1	6.86387e+07	6.29662e+07	9.14653e+07	5.65611e+07	5.6186e+07	5.39891e+07	7.26986e+07	6.62994e+07	5.99792e+07	6.69416e+07	6.34075e+07	7.49398e+07	6.20337e+07	7.76693e+07	5.52405e+07	5.6186e+07	5.36432e+07	6.08662e+07	5.96552e+07	5.90394e+07	6.08233e+07	5.16593e+07	0	0	0	0	0	0	0	0	0	0	0
PARK7_RAT	6	6	130.58	0.30785	1.05436	HCR	LCR	Protein DJ-1 OS=Rattus norvegicus GN=Park7 PE=1 SV=1	6.54427e+07	6.82632e+07	7.32293e+07	6.15563e+07	6.28536e+07	6.67624e+07	6.92922e+07	6.92808e+07	6.52124e+07	6.62835e+07	8.23965e+07	7.14504e+07	6.72523e+07	6.21839e+07	6.01191e+07	6.28536e+07	6.63346e+07	5.80143e+07	6.23379e+07	6.41906e+07	6.02253e+07	6.713e+07	0	0	0	0	0	0	0	0	0	0	0
VDAC3_RAT	4	4	53.04	0.013673	1.15532	HCR	LCR	Voltage-dependent anion-selective channel protein 3 OS=Rattus norvegicus GN=Vdac3 PE=1 SV=2	4.03992e+07	4.79228e+07	4.98543e+07	4.70428e+07	4.38981e+07	5.05219e+07	5.5141e+07	5.58023e+07	4.7417e+07	5.10173e+07	5.77449e+07	4.41079e+07	4.72132e+07	4.23347e+07	4.59445e+07	4.38981e+07	5.01982e+07	4.61663e+07	5.021e+07	4.6674e+07	4.63544e+07	4.70458e+07	0	0	0	0	0	0	0	0	0	0	0	x
H4_RAT	3	3	186.82	0.167699	1.113	LCR	HCR	Histone H4 OS=Rattus norvegicus GN=Hist1h4b PE=1 SV=2	8.47705e+07	7.13036e+07	6.67207e+07	7.5448e+07	6.2731e+07	6.64793e+07	6.805e+07	6.25229e+07	6.25908e+07	7.64621e+07	5.30867e+07	9.25525e+07	7.02477e+07	5.6657e+07	7.36865e+07	6.2731e+07	6.60533e+07	5.69743e+07	5.62571e+07	6.161e+07	6.94736e+07	4.32507e+07	0	0	0	0	0	0	0	0	0	0	0
GDIR1_RAT	4	4	84.43	0.514209	1.04747	HCR	LCR	Rho GDP-dissociation inhibitor 1 OS=Rattus norvegicus GN=Arhgdia PE=1 SV=1	4.34181e+07	3.93572e+07	3.86167e+07	3.16659e+07	3.2398e+07	3.69519e+07	4.02381e+07	3.59978e+07	3.40309e+07	4.01254e+07	4.57671e+07	4.74038e+07	3.87744e+07	3.2792e+07	3.09266e+07	3.2398e+07	3.67151e+07	3.3689e+07	3.23903e+07	3.34976e+07	3.6458e+07	3.72873e+07	0	0	0	0	0	0	0	0	0	0	0
A1AT_RAT	5	5	175.96	0.678396	1.02131	HCR	LCR	Alpha-1-antiproteinase OS=Rattus norvegicus GN=Serpina1 PE=1 SV=2	5.04614e+07	5.33206e+07	6.10527e+07	5.25161e+07	4.77556e+07	4.89817e+07	5.70078e+07	5.87852e+07	4.89651e+07	5.52667e+07	5.59007e+07	5.50937e+07	5.2531e+07	5.18439e+07	5.129e+07	4.77556e+07	4.86678e+07	4.77293e+07	5.2894e+07	4.81979e+07	5.02155e+07	4.55433e+07	0	0	0	0	0	0	0	0	0	0	0
CISY_RAT	7	7	216.85	0.142608	1.09387	HCR	LCR	Citrate synthase, mitochondrial OS=Rattus norvegicus GN=Cs PE=1 SV=1	9.69536e+07	9.92014e+07	9.43032e+07	1.12156e+08	9.99445e+07	1.03271e+08	1.0781e+08	1.14836e+08	1.05588e+08	9.70665e+07	1.31109e+08	1.05854e+08	9.77323e+07	8.00791e+07	1.09538e+08	9.99445e+07	1.0261e+08	9.02626e+07	1.03328e+08	1.03934e+08	8.81949e+07	1.06817e+08	0	0	0	0	0	0	0	0	0	0	0
DHSA_RAT	3	3	161.35	0.984029	1.0006	HCR	LCR	Succinate dehydrogenase [ubiquinone] flavoprotein subunit, mitochondrial OS=Rattus norvegicus GN=Sdha PE=1 SV=1	3.60531e+07	3.76264e+07	3.9857e+07	3.72582e+07	3.37303e+07	3.44917e+07	3.72742e+07	3.81506e+07	3.50747e+07	3.6298e+07	4.02746e+07	3.93628e+07	3.70692e+07	3.38452e+07	3.63883e+07	3.37303e+07	3.42707e+07	3.12075e+07	3.43274e+07	3.45251e+07	3.29805e+07	3.28125e+07	0	0	0	0	0	0	0	0	0	0	0
IGG2A_RAT	3	3	98.27	0.958853	1.00065	LCR	HCR	Ig gamma-2A chain C region OS=Rattus norvegicus GN=Igg-2a PE=1 SV=1	4.11583e+07	5.05193e+07	5.7782e+07	4.76994e+07	5.40443e+07	5.38609e+07	5.23643e+07	4.85895e+07	5.04598e+07	5.2646e+07	4.33287e+07	4.49366e+07	4.97712e+07	4.90666e+07	4.65858e+07	5.40443e+07	5.35158e+07	4.38415e+07	4.37201e+07	4.96692e+07	4.78343e+07	3.53007e+07	0	0	0	0	0	0	0	0	0	0	0
AIFM1_RAT	4	4	69.85	0.0611807	1.12254	HCR	LCR	Apoptosis-inducing factor 1, mitochondrial OS=Rattus norvegicus GN=Aifm1 PE=1 SV=1	3.07742e+07	3.95565e+07	3.66323e+07	3.59724e+07	3.58187e+07	3.60592e+07	4.03892e+07	3.72807e+07	3.97575e+07	4.08889e+07	4.64138e+07	3.35993e+07	3.89707e+07	3.11069e+07	3.51326e+07	3.58187e+07	3.58281e+07	3.38155e+07	3.35446e+07	3.91345e+07	3.71518e+07	3.78142e+07	0	0	0	0	0	0	0	0	0	0	0
GPX1_RAT	5	5	152.32	0.479176	1.0683	HCR	LCR	Glutathione peroxidase 1 OS=Rattus norvegicus GN=Gpx1 PE=1 SV=4	1.05516e+08	7.75884e+07	6.99573e+07	8.50611e+07	7.76855e+07	9.29369e+07	1.11665e+08	8.73619e+07	7.67195e+07	7.46247e+07	8.97413e+07	1.15202e+08	7.64395e+07	5.94054e+07	8.30751e+07	7.76855e+07	9.23414e+07	9.34907e+07	7.8607e+07	7.55174e+07	6.78042e+07	7.31139e+07	0	0	0	0	0	0	0	0	0	0	0
CPT1B_RAT	6	6	117.68	0.371806	1.07021	HCR	LCR	Carnitine O-palmitoyltransferase 1, muscle isoform OS=Rattus norvegicus GN=Cpt1b PE=1 SV=1	4.57267e+07	4.33149e+07	4.89049e+07	4.14917e+07	3.74365e+07	4.7016e+07	5.00336e+07	4.57935e+07	3.90147e+07	4.15177e+07	5.5147e+07	4.99244e+07	4.26735e+07	4.15284e+07	4.0523e+07	3.74365e+07	4.67147e+07	4.18902e+07	4.12043e+07	3.84034e+07	3.7723e+07	4.49293e+07	0	0	0	0	0	0	0	0	0	0	0
THIL_RAT	6	6	256.45	0.0628432	1.08101	HCR	LCR	Acetyl-CoA acetyltransferase, mitochondrial OS=Rattus norvegicus GN=Acat1 PE=1 SV=1	6.58377e+07	7.82761e+07	7.49593e+07	7.59147e+07	7.47481e+07	8.23856e+07	8.22509e+07	7.61373e+07	7.31148e+07	8.08883e+07	8.48488e+07	7.18817e+07	7.7117e+07	6.36529e+07	7.41423e+07	7.47481e+07	8.18577e+07	6.88638e+07	6.85072e+07	7.19692e+07	7.34953e+07	6.91279e+07	0	0	0	0	0	0	0	0	0	0	0
PDLI3_RAT	4	4	118.11	0.323134	1.05041	LCR	HCR	PDZ and LIM domain protein 3 OS=Rattus norvegicus GN=Pdlim3 PE=1 SV=2	3.70552e+07	3.77031e+07	3.99523e+07	3.29638e+07	3.20935e+07	3.21987e+07	3.51061e+07	3.34181e+07	3.2419e+07	3.51762e+07	3.70504e+07	4.04568e+07	3.71448e+07	3.39261e+07	3.21942e+07	3.20935e+07	3.19924e+07	2.93922e+07	3.00691e+07	3.1911e+07	3.19612e+07	3.01857e+07	0	0	0	0	0	0	0	0	0	0	0
SLMAP_RAT	1	1	43.39	0.485653	1.0533	LCR	HCR	Sarcolemmal membrane-associated protein OS=Rattus norvegicus GN=Slmap PE=3 SV=1	5.59386e+06	5.35534e+06	6.67902e+06	5.1033e+06	5.5767e+06	5.6524e+06	5.01161e+06	5.93418e+06	5.41568e+06	6.1142e+06	4.12292e+06	6.10737e+06	5.27604e+06	5.6716e+06	4.98416e+06	5.5767e+06	5.61618e+06	4.19593e+06	5.33949e+06	5.33082e+06	5.55538e+06	3.35902e+06	0	0	0	0	0	0	0	0	0	0	0
HSPB6_RAT	4	4	180.48	0.382503	1.11498	HCR	LCR	Heat shock protein beta-6 OS=Rattus norvegicus GN=Hspb6 PE=1 SV=1	1.97171e+08	1.64284e+08	2.79204e+08	1.79452e+08	1.43165e+08	1.8622e+08	2.1124e+08	2.37664e+08	1.70987e+08	1.9676e+08	2.85966e+08	2.15272e+08	1.61851e+08	2.37091e+08	1.75262e+08	1.43165e+08	1.85027e+08	1.76858e+08	2.13847e+08	1.68308e+08	1.78777e+08	2.32982e+08	0	0	0	0	0	0	0	0	0	0	0
NDUV2_RAT	3	3	62.84	0.972808	1.00429	HCR	LCR	NADH dehydrogenase [ubiquinone] flavoprotein 2, mitochondrial OS=Rattus norvegicus GN=Ndufv2 PE=1 SV=2	3.21915e+07	2.91449e+07	3.00296e+07	3.07919e+07	2.88524e+07	2.72428e+07	2.92429e+07	2.82992e+07	2.9647e+07	3.41689e+07	3.33891e+07	3.51467e+07	2.87133e+07	2.55002e+07	3.0073e+07	2.88524e+07	2.70682e+07	2.44833e+07	2.54632e+07	2.91825e+07	3.10459e+07	2.72028e+07	0	0	0	0	0	0	0	0	0	0	0
CATA_RAT	2	2	46.55	0.646284	1.05557	HCR	LCR	Catalase OS=Rattus norvegicus GN=Cat PE=1 SV=3	9.76833e+06	8.92648e+06	9.62787e+06	9.54929e+06	9.95244e+06	8.9053e+06	1.28281e+07	9.5016e+06	9.86665e+06	7.72027e+06	1.17566e+07	1.06651e+07	8.79429e+06	8.17567e+06	9.32634e+06	9.95244e+06	8.84823e+06	1.07402e+07	8.5494e+06	9.71205e+06	7.01466e+06	9.5783e+06	0	0	0	0	0	0	0	0	0	0	0
1433Z_RAT	2	0	79.42			---	---	14-3-3 protein zeta/delta OS=Rattus norvegicus GN=Ywhaz PE=1 SV=1												0	0	0	0	0	0	0	0	0	0	0	0	0	0	0	0	0	0	0	0	0	0
LEG1_RAT	2	2	112.42	0.263937	1.07503	HCR	LCR	Galectin-1 OS=Rattus norvegicus GN=Lgals1 PE=1 SV=2	1.96388e+07	1.98252e+07	2.64227e+07	2.30882e+07	2.00743e+07	2.03229e+07	2.43554e+07	2.3896e+07	2.22976e+07	2.57544e+07	2.40506e+07	2.14416e+07	1.95316e+07	2.24373e+07	2.25491e+07	2.00743e+07	2.01927e+07	2.03914e+07	2.15013e+07	2.19482e+07	2.34005e+07	1.95945e+07	0	0	0	0	0	0	0	0	0	0	0
PO210_RAT	1	1	30.4	0.814423	1.13898	HCR	LCR	Nuclear pore membrane glycoprotein 210 OS=Rattus norvegicus GN=Pom210 PE=1 SV=1	4.63622e+06	1.22199e+06	1.08006e+06	2.13286e+06	1.54231e+06	1.56237e+06	3.23771e+06	1.46893e+06	1.41036e+06	1.04002e+06	5.78678e+06	5.06183e+06	1.2039e+06	917149	2.08307e+06	1.54231e+06	1.55236e+06	2.71075e+06	1.32172e+06	1.38826e+06	944968	4.7146e+06	0	0	0	0	0	0	0	0	0	0	0
COX5A_RAT	3	3	82.72	0.48189	1.03003	HCR	LCR	Cytochrome c oxidase subunit 5A, mitochondrial OS=Rattus norvegicus GN=Cox5a PE=1 SV=1	8.59479e+07	1.01403e+08	1.13263e+08	1.04857e+08	9.94238e+07	1.02905e+08	1.00308e+08	1.09736e+08	9.84776e+07	1.07653e+08	1.04989e+08	9.3838e+07	9.99013e+07	9.61789e+07	1.02409e+08	9.94238e+07	1.02245e+08	8.39819e+07	9.87388e+07	9.69345e+07	9.78139e+07	8.55366e+07	0	0	0	0	0	0	0	0	0	0	0
GDIB_RAT	3	3	78.25	0.525581	1.06741	HCR	LCR	Rab GDP dissociation inhibitor beta OS=Rattus norvegicus GN=Gdi2 PE=1 SV=2	2.6359e+07	2.71473e+07	3.58868e+07	2.14143e+07	2.04632e+07	2.69483e+07	3.23989e+07	2.22023e+07	2.42703e+07	2.98009e+07	3.25223e+07	2.87787e+07	2.67453e+07	3.04739e+07	2.09143e+07	2.04632e+07	2.67756e+07	2.71257e+07	1.99773e+07	2.389e+07	2.70771e+07	2.64965e+07	0	0	0	0	0	0	0	0	0	0	0
1433G_RAT	4	2	183.54	0.199006	1.09779	HCR	LCR	14-3-3 protein gamma OS=Rattus norvegicus GN=Ywhag PE=1 SV=2	1.26639e+07	1.4665e+07	1.7252e+07	1.37106e+07	1.20609e+07	1.4485e+07	1.4731e+07	1.67781e+07	1.40435e+07	1.487e+07	1.77707e+07	1.38264e+07	1.44478e+07	1.46498e+07	1.33905e+07	1.20609e+07	1.43922e+07	1.23334e+07	1.50967e+07	1.38235e+07	1.35109e+07	1.44781e+07	0	0	0	0	0	0	0	0	0	0	0
1433F_RAT	3	1	91.99	0.493333	1.0827	HCR	LCR	14-3-3 protein eta OS=Rattus norvegicus GN=Ywhah PE=1 SV=2	2.32223e+06	2.51593e+06	2.35638e+06	2.10049e+06	2.12682e+06	2.41852e+06	1.72096e+06	2.66711e+06	2.56638e+06	2.36622e+06	3.10051e+06	2.53541e+06	2.47867e+06	2.00096e+06	2.05145e+06	2.12682e+06	2.40303e+06	1.44086e+06	2.39982e+06	2.52617e+06	2.14995e+06	2.52604e+06	0	0	0	0	0	0	0	0	0	0	0
FABP4_RAT	4	4	94.85	0.0426122	1.15405	HCR	LCR	Fatty acid-binding protein, adipocyte OS=Rattus norvegicus GN=Fabp4 PE=1 SV=3	4.42918e+07	4.55544e+07	5.66565e+07	4.92533e+07	4.45563e+07	5.43677e+07	5.30382e+07	4.97675e+07	5.36248e+07	5.5525e+07	6.64746e+07	4.83578e+07	4.48798e+07	4.81108e+07	4.81033e+07	4.45563e+07	5.40194e+07	4.44057e+07	4.478e+07	5.27845e+07	5.04501e+07	5.41581e+07	0	0	0	0	0	0	0	0	0	0	0	x
ATP5I_RAT	3	3	133.34	0.217949	1.06971	HCR	LCR	ATP synthase subunit e, mitochondrial OS=Rattus norvegicus GN=Atp5i PE=1 SV=3	4.50078e+07	4.98315e+07	5.42327e+07	5.32509e+07	4.67424e+07	4.87413e+07	4.95848e+07	5.95748e+07	5.028e+07	5.33502e+07	5.8181e+07	4.91395e+07	4.90935e+07	4.60526e+07	5.20077e+07	4.67424e+07	4.84289e+07	4.15144e+07	5.36046e+07	4.94921e+07	4.84741e+07	4.74011e+07	0	0	0	0	0	0	0	0	0	0	0
ATP5H_RAT	2	2	63.52	0.00809192	1.15884	HCR	LCR	ATP synthase subunit d, mitochondrial OS=Rattus norvegicus GN=Atp5h PE=1 SV=3	3.67272e+07	4.37282e+07	4.34125e+07	4.06859e+07	4.02522e+07	4.22953e+07	4.77503e+07	5.0993e+07	4.45313e+07	5.00415e+07	4.91937e+07	4.00987e+07	4.30806e+07	3.68644e+07	3.9736e+07	4.02522e+07	4.20243e+07	3.99785e+07	4.58828e+07	4.38335e+07	4.54678e+07	4.0079e+07	0	0	0	0	0	0	0	0	0	0	0	x
CABIN_RAT	1	1	16.3	0.663702	1.04223	HCR	LCR	Calcineurin-binding protein cabin-1 OS=Rattus norvegicus GN=Cabin1 PE=1 SV=1	4.1512e+07	4.56661e+07	4.9278e+07	4.41801e+07	5.4065e+07	5.38295e+07	6.06553e+07	4.73292e+07	4.78509e+07	4.48677e+07	3.90035e+07	4.53228e+07	4.49899e+07	4.18452e+07	4.31486e+07	5.4065e+07	5.34846e+07	5.07831e+07	4.25862e+07	4.71011e+07	4.07669e+07	3.17769e+07	0	0	0	0	0	0	0	0	0	0	0
COX2_RAT	4	4	110.51	0.0458192	1.14188	HCR	LCR	Cytochrome c oxidase subunit 2 OS=Rattus norvegicus GN=Mtco2 PE=2 SV=2	4.51157e+07	5.27753e+07	5.55353e+07	5.32323e+07	4.80097e+07	5.12655e+07	5.73347e+07	6.49703e+07	5.32695e+07	5.67857e+07	6.53362e+07	4.92574e+07	5.19938e+07	4.71588e+07	5.19895e+07	4.80097e+07	5.0937e+07	4.8003e+07	5.84593e+07	5.24348e+07	5.15956e+07	5.32306e+07	0	0	0	0	0	0	0	0	0	0	0	x
GRP78_RAT	4	3	186.89	0.549404	1.05192	LCR	HCR	78 kDa glucose-regulated protein OS=Rattus norvegicus GN=Hspa5 PE=1 SV=1	1.43946e+07	1.14644e+07	1.34865e+07	1.00197e+07	1.04722e+07	1.15752e+07	1.13157e+07	1.16073e+07	1.04141e+07	1.17442e+07	1.16038e+07	1.5716e+07	1.12946e+07	1.14522e+07	9.78577e+06	1.04722e+07	1.1501e+07	9.47399e+06	1.04441e+07	1.02509e+07	1.06708e+07	9.45386e+06	0	0	0	0	0	0	0	0	0	0	0
PROF1_RAT	3	3	97.79	0.922453	1.00783	LCR	HCR	Profilin-1 OS=Rattus norvegicus GN=Pfn1 PE=1 SV=2	4.10788e+07	3.53475e+07	4.15483e+07	3.52621e+07	3.17801e+07	3.5176e+07	3.23572e+07	3.98906e+07	3.47256e+07	4.15157e+07	3.6631e+07	4.48498e+07	3.4824e+07	3.52815e+07	3.44388e+07	3.17801e+07	3.49506e+07	2.70908e+07	3.5893e+07	3.41814e+07	3.77213e+07	2.98439e+07	0	0	0	0	0	0	0	0	0	0	0
PRDX6_RAT	3	3	112.18	0.455201	1.04459	HCR	LCR	Peroxiredoxin-6 OS=Rattus norvegicus GN=Prdx6 PE=1 SV=3	2.92172e+07	3.02366e+07	3.48675e+07	2.81113e+07	2.65301e+07	2.93233e+07	2.86113e+07	3.25781e+07	2.86625e+07	3.1918e+07	3.5633e+07	3.18993e+07	2.97888e+07	2.96083e+07	2.7455e+07	2.65301e+07	2.91354e+07	2.39546e+07	2.93133e+07	2.82134e+07	2.90007e+07	2.90309e+07	0	0	0	0	0	0	0	0	0	0	0
FMOD_RAT	4	4	137.34	0.13756	1.10388	LCR	HCR	Fibromodulin OS=Rattus norvegicus GN=Fmod PE=2 SV=1	4.82426e+07	5.02259e+07	5.64247e+07	4.66873e+07	5.58847e+07	4.6891e+07	5.01108e+07	5.47569e+07	4.19951e+07	4.61202e+07	4.0009e+07	5.26713e+07	4.94821e+07	4.7914e+07	4.55973e+07	5.58847e+07	4.65905e+07	4.19548e+07	4.92695e+07	4.1337e+07	4.19049e+07	3.25961e+07	0	0	0	0	0	0	0	0	0	0	0
NDRG2_RAT	4	4	99.87	0.338562	1.09829	HCR	LCR	Protein NDRG2 OS=Rattus norvegicus GN=Ndrg2 PE=1 SV=1	1.77055e+07	1.94111e+07	1.87893e+07	1.38741e+07	1.67634e+07	1.86779e+07	1.84853e+07	1.52206e+07	1.85063e+07	1.83118e+07	2.4858e+07	1.93308e+07	1.91237e+07	1.59553e+07	1.35501e+07	1.67634e+07	1.85582e+07	1.54766e+07	1.36953e+07	1.82163e+07	1.66382e+07	2.02523e+07	0	0	0	0	0	0	0	0	0	0	0
PADI2_RAT	3	3	81.17	0.140735	1.13795	LCR	HCR	Protein-arginine deiminase type-2 OS=Rattus norvegicus GN=Padi2 PE=1 SV=1	1.50726e+07	1.35411e+07	1.4595e+07	1.4777e+07	1.59215e+07	1.44782e+07	1.19577e+07	9.01619e+06	1.42612e+07	1.44153e+07	1.38085e+07	1.64562e+07	1.33406e+07	1.23936e+07	1.4432e+07	1.59215e+07	1.43855e+07	1.00114e+07	8.11264e+06	1.40377e+07	1.30978e+07	1.125e+07	0	0	0	0	0	0	0	0	0	0	0
TNNT3_RAT	3	3	83.96	0.255231	1.06702	LCR	HCR	Troponin T, fast skeletal muscle OS=Rattus norvegicus GN=Tnnt3 PE=2 SV=2	2.28916e+07	2.63243e+07	2.89301e+07	2.53792e+07	3.00762e+07	2.48874e+07	2.40554e+07	2.43711e+07	2.62707e+07	2.7222e+07	2.34452e+07	2.4993e+07	2.59344e+07	2.45665e+07	2.47867e+07	3.00762e+07	2.47279e+07	2.01401e+07	2.19287e+07	2.58591e+07	2.4734e+07	1.91012e+07	0	0	0	0	0	0	0	0	0	0	0
CASQ2_RAT	4	4	85.06	0.306529	1.05479	LCR	HCR	Calsequestrin-2 OS=Rattus norvegicus GN=Casq2 PE=1 SV=2	2.96389e+07	2.66722e+07	2.92372e+07	2.60654e+07	2.30969e+07	2.4343e+07	2.44205e+07	2.77732e+07	2.5364e+07	2.51093e+07	2.62462e+07	3.23597e+07	2.62773e+07	2.48273e+07	2.54568e+07	2.30969e+07	2.4187e+07	2.04459e+07	2.49899e+07	2.49666e+07	2.28144e+07	2.13833e+07	0	0	0	0	0	0	0	0	0	0	0
NDUAA_RAT	3	3	92.71	0.356012	1.05083	HCR	LCR	NADH dehydrogenase [ubiquinone] 1 alpha subcomplex subunit 10, mitochondrial OS=Rattus norvegicus GN=Ndufa10 PE=1 SV=1	2.56985e+07	2.50567e+07	2.31695e+07	2.53966e+07	2.14244e+07	2.40634e+07	2.4031e+07	2.54678e+07	2.4002e+07	2.46949e+07	3.00009e+07	2.80577e+07	2.46856e+07	1.96748e+07	2.48037e+07	2.14244e+07	2.39092e+07	2.01197e+07	2.29155e+07	2.36259e+07	2.24379e+07	2.44423e+07	0	0	0	0	0	0	0	0	0	0	0
PRELP_RAT	3	3	108.84	0.538532	1.03779	LCR	HCR	Prolargin OS=Rattus norvegicus GN=Prelp PE=2 SV=1	3.87062e+07	3.79986e+07	4.3906e+07	3.37605e+07	3.38418e+07	3.47929e+07	3.49496e+07	4.14439e+07	3.52069e+07	3.51423e+07	3.60958e+07	4.22594e+07	3.74359e+07	3.72835e+07	3.29722e+07	3.38418e+07	3.457e+07	2.92613e+07	3.72906e+07	3.46552e+07	3.19303e+07	2.94079e+07	0	0	0	0	0	0	0	0	0	0	0
PPIA_RAT	4	4	83	0.427161	1.02708	LCR	HCR	Peptidyl-prolyl cis-trans isomerase A OS=Rattus norvegicus GN=Ppia PE=1 SV=2	3.85532e+07	3.44164e+07	3.61198e+07	3.4535e+07	3.38708e+07	3.32981e+07	3.66291e+07	3.41953e+07	3.28238e+07	3.32279e+07	3.72044e+07	4.20924e+07	3.39067e+07	3.06718e+07	3.37287e+07	3.38708e+07	3.30847e+07	3.06674e+07	3.07684e+07	3.23095e+07	3.01909e+07	3.03111e+07	0	0	0	0	0	0	0	0	0	0	0
ACOT2_RAT	2	2	70.3	0.0836988	1.09176	HCR	LCR	Acyl-coenzyme A thioesterase 2, mitochondrial OS=Rattus norvegicus GN=Acot2 PE=1 SV=1	1.5547e+07	1.33881e+07	1.53267e+07	1.52095e+07	1.35341e+07	1.51216e+07	1.66001e+07	1.78002e+07	1.48213e+07	1.48064e+07	1.6496e+07	1.69742e+07	1.31898e+07	1.30149e+07	1.48544e+07	1.35341e+07	1.50247e+07	1.38983e+07	1.60163e+07	1.4589e+07	1.34531e+07	1.34396e+07	0	0	0	0	0	0	0	0	0	0	0
ANXA2_RAT	3	3	64.44	0.776495	1.00907	LCR	HCR	Annexin A2 OS=Rattus norvegicus GN=Anxa2 PE=1 SV=2	2.17877e+07	1.94822e+07	1.95646e+07	2.0717e+07	1.88704e+07	2.06089e+07	1.9389e+07	1.95763e+07	2.02143e+07	2.06931e+07	1.89421e+07	2.37878e+07	1.91937e+07	1.66136e+07	2.02333e+07	1.88704e+07	2.04768e+07	1.62333e+07	1.76145e+07	1.98975e+07	1.88018e+07	1.54325e+07	0	0	0	0	0	0	0	0	0	0	0
HSP74_RAT	2	2	33.91	0.927066	1.00493	HCR	LCR	Heat shock 70 kDa protein 4 OS=Rattus norvegicus GN=Hspa4 PE=1 SV=1	2.0756e+06	1.86276e+06	2.72998e+06	1.74576e+06	1.43267e+06	2.15438e+06	1.96635e+06	1.01282e+06	1.73855e+06	2.16267e+06	2.83967e+06	2.26615e+06	1.83518e+06	2.31821e+06	1.705e+06	1.43267e+06	2.14057e+06	1.64631e+06	911319	1.71131e+06	1.96501e+06	2.31353e+06	0	0	0	0	0	0	0	0	0	0	0
SAHH_RAT	1	1	36.3	0.325387	1.2495	HCR	LCR	Adenosylhomocysteinase OS=Rattus norvegicus GN=Ahcy PE=1 SV=3	7.08521e+06	7.1792e+06	7.48152e+06	3.66703e+06	8.1489e+06	9.62682e+06	1.31673e+07	8.03066e+06	7.8319e+06	6.99455e+06	4.67142e+06	7.73563e+06	7.07289e+06	6.35306e+06	3.58141e+06	8.1489e+06	9.56513e+06	1.10242e+07	7.22587e+06	7.70918e+06	6.35526e+06	3.80589e+06	0	0	0	0	0	0	0	0	0	0	0
TNNI1_RAT	2	2	158.51	0.948856	1.03504	HCR	LCR	Troponin I, slow skeletal muscle OS=Rattus norvegicus GN=Tnni1 PE=1 SV=2	7.49675e+07	7.93632e+07	8.18489e+07	5.76437e+07	8.42931e+07	9.25288e+07	1.10521e+08	7.55272e+07	7.22157e+07	7.22091e+07	4.66378e+07	8.18495e+07	7.8188e+07	6.95033e+07	5.62979e+07	8.42931e+07	9.19359e+07	9.25323e+07	6.79583e+07	7.10841e+07	6.56094e+07	3.79967e+07	0	0	0	0	0	0	0	0	0	0	0
COF1_RAT	3	3	104.34	0.39378	1.09549	HCR	LCR	Cofilin-1 OS=Rattus norvegicus GN=Cfl1 PE=1 SV=3	3.64884e+07	3.58591e+07	3.95188e+07	3.46161e+07	2.91669e+07	3.46135e+07	3.53274e+07	4.13054e+07	3.27224e+07	3.44862e+07	5.24523e+07	3.98381e+07	3.53281e+07	3.35581e+07	3.38079e+07	2.91669e+07	3.43917e+07	2.95776e+07	3.7166e+07	3.22097e+07	3.13343e+07	4.27338e+07	0	0	0	0	0	0	0	0	0	0	0
CYC_RAT	3	3	74.11	0.0789709	1.11249	HCR	LCR	Cytochrome c, somatic OS=Rattus norvegicus GN=Cycs PE=1 SV=2	6.04741e+07	6.0378e+07	5.89989e+07	5.64307e+07	4.84835e+07	5.61841e+07	7.08034e+07	5.96534e+07	6.06473e+07	6.741e+07	6.54611e+07	6.60257e+07	5.94839e+07	5.00999e+07	5.51132e+07	4.84835e+07	5.58241e+07	5.92794e+07	5.36752e+07	5.9697e+07	6.12488e+07	5.33324e+07	0	0	0	0	0	0	0	0	0	0	0
ACADM_RAT	2	2	46.53	0.97121	1.00891	HCR	LCR	Medium-chain specific acyl-CoA dehydrogenase, mitochondrial OS=Rattus norvegicus GN=Acadm PE=1 SV=1	3.7804e+07	2.08706e+07	1.94454e+07	1.91559e+07	1.6979e+07	1.84855e+07	1.97432e+07	1.59554e+07	2.15785e+07	1.9069e+07	4.34955e+07	4.12744e+07	2.05615e+07	1.65124e+07	1.87086e+07	1.6979e+07	1.83671e+07	1.65298e+07	1.43564e+07	2.12404e+07	1.73262e+07	3.54366e+07	0	0	0	0	0	0	0	0	0	0	0
ACBP_RAT	2	2	68.5	0.869304	1.02323	HCR	LCR	Acyl-CoA-binding protein OS=Rattus norvegicus GN=Dbi PE=1 SV=3	5.13138e+07	5.30867e+07	5.56415e+07	4.49624e+07	4.05501e+07	5.08565e+07	5.35582e+07	5.52284e+07	4.47805e+07	3.64142e+07	6.06724e+07	5.60244e+07	5.23006e+07	4.72489e+07	4.39127e+07	4.05501e+07	5.05306e+07	4.48411e+07	4.96937e+07	4.40788e+07	3.3086e+07	4.94309e+07	0	0	0	0	0	0	0	0	0	0	0
SODM_RAT	3	3	74.63	0.949627	1.01753	HCR	LCR	Superoxide dismutase [Mn], mitochondrial OS=Rattus norvegicus GN=Sod2 PE=1 SV=2	7.2562e+06	8.78518e+06	8.05403e+06	6.45431e+06	7.63865e+06	7.7733e+06	9.16711e+06	5.22441e+06	7.33572e+06	8.34627e+06	8.78256e+06	7.92233e+06	8.65509e+06	6.83921e+06	6.30362e+06	7.63865e+06	7.72349e+06	7.67508e+06	4.70084e+06	7.22077e+06	7.58344e+06	7.15532e+06	0	0	0	0	0	0	0	0	0	0	0
PRDX2_RAT	2	2	49.56	0.919686	1.01226	HCR	LCR	Peroxiredoxin-2 OS=Rattus norvegicus GN=Prdx2 PE=1 SV=3	8.55616e+06	8.40242e+06	9.67346e+06	8.54769e+06	7.38109e+06	7.3633e+06	8.46715e+06	8.68059e+06	7.64905e+06	8.60643e+06	1.09329e+07	9.34161e+06	8.27799e+06	8.21438e+06	8.34812e+06	7.38109e+06	7.31611e+06	7.08904e+06	7.81066e+06	7.5292e+06	7.81982e+06	8.90721e+06	0	0	0	0	0	0	0	0	0	0	0
SODC_RAT	2	2	89.75	0.857877	1.01291	LCR	HCR	Superoxide dismutase [Cu-Zn] OS=Rattus norvegicus GN=Sod1 PE=1 SV=2	2.14769e+07	2.32112e+07	2.59341e+07	2.26728e+07	1.88451e+07	1.94132e+07	2.26852e+07	2.46614e+07	1.94538e+07	2.1347e+07	2.5292e+07	2.34484e+07	2.28675e+07	2.20224e+07	2.21434e+07	1.88451e+07	1.92888e+07	1.8993e+07	2.21899e+07	1.9149e+07	1.9396e+07	2.06058e+07	0	0	0	0	0	0	0	0	0	0	0
MIF_RAT	2	2	95.79	0.710961	1.0238	HCR	LCR	Macrophage migration inhibitory factor OS=Rattus norvegicus GN=Mif PE=1 SV=4	3.56556e+07	3.98121e+07	3.87261e+07	3.83003e+07	3.45576e+07	3.39349e+07	4.15308e+07	3.79244e+07	3.44877e+07	3.7456e+07	4.44697e+07	3.89288e+07	3.92226e+07	3.28849e+07	3.74061e+07	3.45576e+07	3.37174e+07	3.47713e+07	3.41238e+07	3.39473e+07	3.40326e+07	3.62303e+07	0	0	0	0	0	0	0	0	0	0	0
ECI2_RAT	1	1	40.28	0.92754	1.03011	LCR	HCR	Enoyl-CoA delta isomerase 2, mitochondrial OS=Rattus norvegicus GN=Eci2 PE=1 SV=1	3.03448e+06	1.82898e+06	1.56022e+06	1.75006e+06	1.81728e+06	1.69314e+06	1.94196e+06	1.96255e+06	1.49688e+06	2.15324e+06	2.39101e+06	3.31305e+06	1.8019e+06	1.32488e+06	1.7092e+06	1.81728e+06	1.68229e+06	1.62589e+06	1.76588e+06	1.47342e+06	1.95644e+06	1.948e+06	0	0	0	0	0	0	0	0	0	0	0
ODO2_RAT	2	2	108.45	0.0684371	1.12781	HCR	LCR	Dihydrolipoyllysine-residue succinyltransferase component of 2-oxoglutarate dehydrogenase complex, mitochondrial OS=Rattus norvegicus GN=Dlst PE=1 SV=2	1.34121e+07	1.66002e+07	1.72771e+07	1.69056e+07	1.42666e+07	1.60923e+07	1.65042e+07	2.01349e+07	1.6947e+07	1.81469e+07	1.83627e+07	1.46434e+07	1.63543e+07	1.46712e+07	1.65109e+07	1.42666e+07	1.59892e+07	1.3818e+07	1.81171e+07	1.66815e+07	1.64883e+07	1.49604e+07	0	0	0	0	0	0	0	0	0	0	0
ECHM_RAT	3	3	76.21	0.0244936	1.19328	HCR	LCR	Enoyl-CoA hydratase, mitochondrial OS=Rattus norvegicus GN=Echs1 PE=1 SV=1	1.91896e+07	2.32917e+07	2.45885e+07	2.05399e+07	2.12043e+07	2.32626e+07	2.49681e+07	2.71671e+07	2.41515e+07	2.45356e+07	3.17295e+07	2.09512e+07	2.29468e+07	2.08797e+07	2.00604e+07	2.12043e+07	2.31136e+07	2.09043e+07	2.44446e+07	2.37731e+07	2.22931e+07	2.58507e+07	0	0	0	0	0	0	0	0	0	0	0	x
HSPB7_RAT	2	2	70.59	0.332825	1.07659	HCR	LCR	Heat shock protein beta-7 (Fragment) OS=Rattus norvegicus GN=Hspb7 PE=2 SV=1	3.12417e+07	3.06319e+07	3.6813e+07	3.08981e+07	2.73077e+07	3.08098e+07	3.17602e+07	3.46761e+07	3.15803e+07	3.1375e+07	4.2489e+07	3.41097e+07	3.01782e+07	3.12604e+07	3.01767e+07	2.73077e+07	3.06124e+07	2.6591e+07	3.1201e+07	3.10855e+07	2.85074e+07	3.46166e+07	0	0	0	0	0	0	0	0	0	0	0
DOPD_RAT	2	2	42.63	0.247479	1.11491	HCR	LCR	D-dopachrome decarboxylase OS=Rattus norvegicus GN=Ddt PE=1 SV=3	1.8152e+07	2.00084e+07	1.66438e+07	2.02005e+07	1.93896e+07	2.05818e+07	1.55718e+07	2.17597e+07	2.00485e+07	2.30449e+07	2.52824e+07	1.98184e+07	1.97121e+07	1.41334e+07	1.97289e+07	1.93896e+07	2.04499e+07	1.30373e+07	1.9579e+07	1.97344e+07	2.09387e+07	2.0598e+07	0	0	0	0	0	0	0	0	0	0	0
ACADS_RAT	2	2	75.47	0.373899	1.05667	HCR	LCR	Short-chain specific acyl-CoA dehydrogenase, mitochondrial OS=Rattus norvegicus GN=Acads PE=1 SV=2	2.34475e+07	3.11264e+07	3.40633e+07	2.9562e+07	2.72561e+07	2.98919e+07	2.78566e+07	3.15851e+07	3.00553e+07	3.0694e+07	3.43553e+07	2.55999e+07	3.06655e+07	2.89254e+07	2.88718e+07	2.72561e+07	2.97003e+07	2.33227e+07	2.84198e+07	2.95844e+07	2.78886e+07	2.79899e+07	0	0	0	0	0	0	0	0	0	0	0
GSTP1_RAT	2	2	109.03	0.746301	1.01219	HCR	LCR	Glutathione S-transferase P OS=Rattus norvegicus GN=Gstp1 PE=1 SV=2	1.27595e+07	1.17345e+07	1.41267e+07	1.17818e+07	1.3298e+07	1.24812e+07	1.38767e+07	1.24262e+07	1.20714e+07	1.35295e+07	1.29875e+07	1.39308e+07	1.15608e+07	1.19959e+07	1.15068e+07	1.3298e+07	1.24012e+07	1.16182e+07	1.11809e+07	1.18823e+07	1.2293e+07	1.05811e+07	0	0	0	0	0	0	0	0	0	0	0
PTRF_RAT	4	4	184.14	0.156417	1.11038	HCR	LCR	Polymerase I and transcript release factor OS=Rattus norvegicus GN=Ptrf PE=1 SV=1	2.96439e+07	2.99659e+07	2.79737e+07	3.05731e+07	2.54207e+07	2.73088e+07	2.95489e+07	3.54513e+07	3.08088e+07	2.98361e+07	3.83561e+07	3.23652e+07	2.95222e+07	2.37543e+07	2.98593e+07	2.54207e+07	2.71338e+07	2.47395e+07	3.18985e+07	3.03261e+07	2.71092e+07	3.12494e+07	0	0	0	0	0	0	0	0	0	0	0
ETFD_RAT	2	2	61.44	0.904153	1.01922	LCR	HCR	Electron transfer flavoprotein-ubiquinone oxidoreductase, mitochondrial OS=Rattus norvegicus GN=Etfdh PE=2 SV=1	1.82491e+07	1.42656e+07	1.56081e+07	1.1879e+07	1.27112e+07	1.30775e+07	1.40092e+07	1.50005e+07	1.36167e+07	1.58052e+07	1.41016e+07	1.99244e+07	1.40544e+07	1.32539e+07	1.16017e+07	1.27112e+07	1.29937e+07	1.1729e+07	1.34972e+07	1.34034e+07	1.43606e+07	1.14888e+07	0	0	0	0	0	0	0	0	0	0	0
PRDX3_RAT	2	2	70.89	0.722613	1.02073	HCR	LCR	Thioredoxin-dependent peroxide reductase, mitochondrial OS=Rattus norvegicus GN=Prdx3 PE=1 SV=2	1.4182e+07	1.44109e+07	1.30719e+07	1.42769e+07	1.27175e+07	1.15648e+07	1.41777e+07	1.49562e+07	1.3898e+07	1.49116e+07	1.4591e+07	1.54839e+07	1.41975e+07	1.11003e+07	1.39435e+07	1.27175e+07	1.14907e+07	1.18701e+07	1.34574e+07	1.36803e+07	1.35487e+07	1.18876e+07	0	0	0	0	0	0	0	0	0	0	0
TRY1_RAT	3	3	117.92	0.253495	1.17079	HCR	LCR	Anionic trypsin-1 OS=Rattus norvegicus GN=Prss1 PE=1 SV=1	3.44251e+07	6.21299e+07	7.37474e+07	4.48887e+07	3.28117e+07	5.44018e+07	6.946e+07	5.81032e+07	4.28658e+07	6.37852e+07	5.98155e+07	3.75853e+07	6.12098e+07	6.26238e+07	4.38407e+07	3.28117e+07	5.40532e+07	5.81547e+07	5.22804e+07	4.21941e+07	5.79554e+07	4.87329e+07	0	0	0	0	0	0	0	0	0	0	0
H2A1C_RAT	1	1	38.9	0.423697	1.07874	LCR	HCR	Histone H2A type 1-C OS=Rattus norvegicus PE=1 SV=2	2.26173e+07	2.37196e+07	2.07552e+07	2.31044e+07	1.6989e+07	2.08873e+07	1.97336e+07	1.70343e+07	2.07237e+07	2.56468e+07	1.52087e+07	2.46936e+07	2.33684e+07	1.76246e+07	2.2565e+07	1.6989e+07	2.07534e+07	1.65218e+07	1.53272e+07	2.0399e+07	2.33028e+07	1.23908e+07	0	0	0	0	0	0	0	0	0	0	0
H2B1_RAT	1	1	34.61	0.3969	1.03889	LCR	HCR	Histone H2B type 1 OS=Rattus norvegicus PE=1 SV=2	5.66567e+07	6.25754e+07	5.54632e+07	5.93637e+07	5.28781e+07	5.07203e+07	5.89789e+07	5.56396e+07	4.94825e+07	5.96476e+07	5.69657e+07	6.18578e+07	6.16487e+07	4.70975e+07	5.79777e+07	5.28781e+07	5.03953e+07	4.93795e+07	5.00637e+07	4.87072e+07	5.41959e+07	4.6411e+07	0	0	0	0	0	0	0	0	0	0	0
CASQ1_RAT	1	1	47.76	0.635244	1.09406	HCR	LCR	Calsequestrin-1 (Fragment) OS=Rattus norvegicus GN=Casq1 PE=1 SV=1	6.75306e+06	2.65743e+07	2.83019e+07	1.53624e+07	1.7508e+07	2.4132e+07	8.85714e+06	2.04719e+07	2.04155e+07	2.15505e+07	2.86386e+07	7.37299e+06	2.61807e+07	2.40331e+07	1.50037e+07	1.7508e+07	2.39774e+07	7.41556e+06	1.84203e+07	2.00956e+07	1.95808e+07	2.33324e+07	0	0	0	0	0	0	0	0	0	0	0
ES1_RAT	2	2	36.64	0.164941	1.09086	HCR	LCR	ES1 protein homolog, mitochondrial OS=Rattus norvegicus PE=1 SV=2	1.80264e+07	2.30548e+07	2.00726e+07	2.32118e+07	2.0627e+07	2.03171e+07	2.18381e+07	2.48734e+07	2.13897e+07	2.37425e+07	2.52776e+07	1.96812e+07	2.27134e+07	1.7045e+07	2.26698e+07	2.0627e+07	2.0187e+07	1.82837e+07	2.23807e+07	2.10545e+07	2.15725e+07	2.05942e+07	0	0	0	0	0	0	0	0	0	0	0
THIO_RAT	1	1	78.18	0.408175	1.07722	HCR	LCR	Thioredoxin OS=Rattus norvegicus GN=Txn PE=1 SV=2	1.59551e+07	1.70151e+07	1.72818e+07	1.61928e+07	1.29157e+07	1.69778e+07	1.58233e+07	1.76124e+07	1.39999e+07	1.63795e+07	2.17935e+07	1.74198e+07	1.67632e+07	1.46751e+07	1.58147e+07	1.29157e+07	1.6869e+07	1.32479e+07	1.58474e+07	1.37805e+07	1.48825e+07	1.77555e+07	0	0	0	0	0	0	0	0	0	0	0
ATP5J_RAT	2	2	85.55	0.0528599	1.13625	HCR	LCR	ATP synthase-coupling factor 6, mitochondrial OS=Rattus norvegicus GN=Atp5j PE=1 SV=1	2.07967e+07	2.45166e+07	2.74473e+07	2.30567e+07	2.14592e+07	2.61584e+07	2.67693e+07	3.06032e+07	2.36295e+07	2.64431e+07	2.63037e+07	2.27059e+07	2.41535e+07	2.33073e+07	2.25184e+07	2.14592e+07	2.59908e+07	2.24123e+07	2.75363e+07	2.32592e+07	2.40262e+07	2.14301e+07	0	0	0	0	0	0	0	0	0	0	0
PROF2_RAT	1	1	66.93	0.121845	1.14103	HCR	LCR	Profilin-2 OS=Rattus norvegicus GN=Pfn2 PE=1 SV=3	6.01642e+06	6.91285e+06	8.31256e+06	5.97981e+06	6.18502e+06	6.59514e+06	7.44187e+06	8.26034e+06	6.55533e+06	8.18155e+06	8.70725e+06	6.56872e+06	6.81048e+06	7.05875e+06	5.8402e+06	6.18502e+06	6.55288e+06	6.23063e+06	7.43253e+06	6.45261e+06	7.43378e+06	7.09396e+06	0	0	0	0	0	0	0	0	0	0	0
ATPD_RAT	1	1	77.14	0.0780419	1.41529	HCR	LCR	ATP synthase subunit delta, mitochondrial OS=Rattus norvegicus GN=Atp5d PE=1 SV=2	2.84147e+06	4.33152e+06	5.53528e+06	1.42067e+06	4.64078e+06	5.14083e+06	5.35557e+06	4.58032e+06	5.34535e+06	5.32942e+06	6.12598e+06	3.10232e+06	4.26738e+06	4.70038e+06	1.3875e+06	4.64078e+06	5.10789e+06	4.4839e+06	4.1213e+06	5.26159e+06	4.84233e+06	4.99095e+06	0	0	0	0	0	0	0	0	0	0	0
KAD1_RAT	1	1	42.21	0.209879	1.09889	HCR	LCR	Adenylate kinase isoenzyme 1 OS=Rattus norvegicus GN=Ak1 PE=1 SV=3	1.66204e+07	2.21666e+07	2.56182e+07	1.96413e+07	2.13438e+07	2.26315e+07	2.57045e+07	2.39159e+07	1.99109e+07	2.39694e+07	2.28424e+07	1.81462e+07	2.18383e+07	2.17541e+07	1.91827e+07	2.13438e+07	2.24865e+07	2.15209e+07	2.15192e+07	1.95989e+07	2.17787e+07	1.86101e+07	0	0	0	0	0	0	0	0	0	0	0
USMG5_RAT	1	1	34.75	0.594013	1.03268	LCR	HCR	Up-regulated during skeletal muscle growth protein 5 OS=Rattus norvegicus GN=Usmg5 PE=2 SV=1	1.16308e+07	1.29312e+07	1.22074e+07	1.27575e+07	1.06931e+07	1.18745e+07	1.05891e+07	1.25774e+07	1.17579e+07	1.37102e+07	9.4682e+06	1.26986e+07	1.27397e+07	1.03662e+07	1.24596e+07	1.06931e+07	1.17984e+07	8.86559e+06	1.1317e+07	1.15737e+07	1.24571e+07	7.71392e+06	0	0	0	0	0	0	0	0	0	0	0
PPAC_RAT	1	1	33.87	0.569362	1.0435	HCR	LCR	Low molecular weight phosphotyrosine protein phosphatase OS=Rattus norvegicus GN=Acp1 PE=1 SV=3	6.9092e+06	8.00753e+06	9.31328e+06	5.07144e+06	6.7227e+06	7.30392e+06	7.36724e+06	7.21575e+06	7.17023e+06	7.07128e+06	8.98091e+06	7.54347e+06	7.88895e+06	7.90852e+06	4.95303e+06	6.7227e+06	7.25712e+06	6.16816e+06	6.49263e+06	7.05788e+06	6.42498e+06	7.31691e+06	0	0	0	0	0	0	0	0	0	0	0
TNNI2_RAT	1	1	35.11	0.0992837	1.34234	LCR	HCR	Troponin I, fast skeletal muscle OS=Rattus norvegicus GN=Tnni2 PE=2 SV=2	1.1457e+07	1.03201e+07	7.036e+06	1.2886e+07	1.20913e+07	8.66037e+06	9.42467e+06	6.19505e+06	9.73788e+06	9.45044e+06	4.61813e+06	1.25088e+07	1.01673e+07	5.97474e+06	1.25851e+07	1.20913e+07	8.60488e+06	7.89071e+06	5.57422e+06	9.5853e+06	8.58669e+06	3.76248e+06	0	0	0	0	0	0	0	0	0	0	0
HSPB2_RAT	1	1	34.81	0.239016	1.06897	LCR	HCR	Heat shock protein beta-2 OS=Rattus norvegicus GN=Hspb2 PE=2 SV=1	1.0223e+07	1.01745e+07	9.82756e+06	9.29123e+06	9.27098e+06	9.23176e+06	9.35524e+06	9.21654e+06	8.60235e+06	7.53313e+06	1.08283e+07	1.11615e+07	1.00238e+07	8.34523e+06	9.07431e+06	9.27098e+06	9.17261e+06	7.83259e+06	8.29291e+06	8.46755e+06	6.84461e+06	8.82198e+06	0	0	0	0	0	0	0	0	0	0	0
CISD1_RAT	1	1	47.77	0.25057	1.06286	HCR	LCR	CDGSH iron-sulfur domain-containing protein 1 OS=Rattus norvegicus GN=Cisd1 PE=3 SV=1	8.79978e+06	8.29197e+06	9.32076e+06	7.77779e+06	7.62409e+06	8.5394e+06	8.63673e+06	1.03352e+07	8.16684e+06	8.81996e+06	8.83343e+06	9.6076e+06	8.16918e+06	7.91488e+06	7.5962e+06	7.62409e+06	8.48468e+06	7.23102e+06	9.29948e+06	8.03887e+06	8.01383e+06	7.19676e+06	0	0	0	0	0	0	0	0	0	0	0
NDUAB_RAT	1	1	34.57	0.127338	1.08395	HCR	LCR	NADH dehydrogenase [ubiquinone] 1 alpha subcomplex subunit 11 OS=Rattus norvegicus GN=Ndufa11 PE=2 SV=1	1.07708e+07	9.99089e+06	9.94251e+06	9.52514e+06	9.89257e+06	1.00441e+07	1.13699e+07	1.06353e+07	1.004e+07	1.0309e+07	1.27973e+07	1.17596e+07	9.84294e+06	8.44284e+06	9.30275e+06	9.89257e+06	9.97971e+06	9.51931e+06	9.5695e+06	9.8827e+06	9.36682e+06	1.04262e+07	0	0	0	0	0	0	0	0	0	0	0
HCD2_RAT	1	1	60.2	0.297367	1.08699	HCR	LCR	3-hydroxyacyl-CoA dehydrogenase type-2 OS=Rattus norvegicus GN=Hsd17b10 PE=1 SV=3	6.79946e+06	9.39974e+06	8.80874e+06	9.31682e+06	6.55002e+06	8.96541e+06	8.53677e+06	9.94229e+06	7.99737e+06	8.06022e+06	9.81439e+06	7.42366e+06	9.26055e+06	7.48009e+06	9.0993e+06	6.55002e+06	8.90796e+06	7.14733e+06	8.94592e+06	7.87205e+06	7.32353e+06	7.99597e+06	0	0	0	0	0	0	0	0	0	0	0
UCRI_RAT	1	1	69.31	0.655967	1.06749	HCR	LCR	Cytochrome b-c1 complex subunit Rieske, mitochondrial OS=Rattus norvegicus GN=Uqcrfs1 PE=1 SV=2	9.53926e+06	1.18703e+07	7.80926e+06	1.23137e+07	1.15067e+07	1.14549e+07	1.37167e+07	1.2033e+07	1.2078e+07	1.15779e+07	7.08235e+06	1.0415e+07	1.16946e+07	6.63137e+06	1.20262e+07	1.15067e+07	1.13815e+07	1.14842e+07	1.08271e+07	1.18887e+07	1.05197e+07	5.77012e+06	0	0	0	0	0	0	0	0	0	0	0
SMPX_RAT	1	1	79.36	0.43544	1.1078	HCR	LCR	Small muscular protein OS=Rattus norvegicus GN=Smpx PE=2 SV=1	2.91765e+06	2.75615e+06	3.19428e+06	720899	2.07276e+06	2.61743e+06	2.72794e+06	1.96893e+06	2.30883e+06	2.97198e+06	2.90751e+06	3.1855e+06	2.71533e+06	2.71247e+06	704068	2.07276e+06	2.60066e+06	2.28394e+06	1.77161e+06	2.27265e+06	2.70034e+06	2.3688e+06	0	0	0	0	0	0	0	0	0	0	0
DYL2_RAT	1	1	45.5	0.550176	1.08138	HCR	LCR	Dynein light chain 2, cytoplasmic OS=Rattus norvegicus GN=Dynll2 PE=1 SV=1	4.04376e+06	4.42652e+06	2.41656e+06	4.06599e+06	3.34932e+06	4.15249e+06	3.05948e+06	3.43474e+06	3.35564e+06	4.65822e+06	5.08929e+06	4.41497e+06	4.36097e+06	2.05206e+06	3.97106e+06	3.34932e+06	4.12588e+06	2.56152e+06	3.09053e+06	3.30306e+06	4.23246e+06	4.14634e+06	0	0	0	0	0	0	0	0	0	0	0
ADHX_RAT	1	1	47.25	0.518667	1.04508	HCR	LCR	Alcohol dehydrogenase class-3 OS=Rattus norvegicus GN=Adh5 PE=1 SV=2	4.50012e+06	4.79816e+06	5.25732e+06	4.53897e+06	4.23466e+06	4.04121e+06	5.18471e+06	5.52848e+06	4.42101e+06	5.08044e+06	5.00129e+06	4.91323e+06	4.72711e+06	4.46434e+06	4.43299e+06	4.23466e+06	4.01532e+06	4.34085e+06	4.97445e+06	4.35174e+06	4.6161e+06	4.07465e+06	0	0	0	0	0	0	0	0	0	0	0
PTGR2_RAT	1	1	34.86	0.164341	1.1803	LCR	HCR	Prostaglandin reductase 2 OS=Rattus norvegicus GN=Ptgr2 PE=2 SV=2	3.65821e+06	3.18861e+06	2.18605e+06	2.63582e+06	3.19887e+06	2.26568e+06	2.30641e+06	2.83911e+06	2.21802e+06	2.29912e+06	3.18738e+06	3.99404e+06	3.1414e+06	1.85632e+06	2.57428e+06	3.19887e+06	2.25117e+06	1.93102e+06	2.55458e+06	2.18327e+06	2.08898e+06	2.59682e+06	0	0	0	0	0	0	0	0	0	0	0

## Sheet: Supplementary table
Accession	Description	Confidence score	Peptide count	Peptides used for quantitation	LCR Mean	LCR SD	HCR Mean	HCR SD	Max fold change	Anova (p)
1433E_RAT;1433T_RAT	14-3-3 protein epsilon OS=Rattus norvegicus GN=Ywhae PE=1 SV=1	235.98	5	3	37.1779	4.1018	40.1133	4.23053	1.07896	0.257774
1433F_RAT	14-3-3 protein eta OS=Rattus norvegicus GN=Ywhah PE=1 SV=2	91.99	3	1	2.28437	0.172389	2.47328	0.451684	1.0827	0.493333
1433G_RAT	14-3-3 protein gamma OS=Rattus norvegicus GN=Ywhag PE=1 SV=2	183.54	4	2	14.0705	2.03848	15.4464	1.47731	1.09779	0.199006
A1AT_RAT	Alpha-1-antiproteinase OS=Rattus norvegicus GN=Serpina1 PE=1 SV=2	175.96	5	5	53.0213	4.97818	54.1512	4.18469	1.02131	0.678396
AATC_RAT	Aspartate aminotransferase, cytoplasmic OS=Rattus norvegicus GN=Got1 PE=1 SV=3	503.73	9	9	201.123	13.4805	211	25.9818	1.04911	0.503931
AATM_RAT	Aspartate aminotransferase, mitochondrial OS=Rattus norvegicus GN=Got2 PE=1 SV=2	558.03	11	11	203.906	15.5262	221.988	19.2652	1.08868	0.122768
ACADL_RAT	Long-chain specific acyl-CoA dehydrogenase, mitochondrial OS=Rattus norvegicus GN=Acadl PE=1 SV=1	541.49	10	10	270.577	18.8994	304.342	33.8998	1.12479	0.0728474
ACADM_RAT	Medium-chain specific acyl-CoA dehydrogenase, mitochondrial OS=Rattus norvegicus GN=Acadm PE=1 SV=1	46.53	2	2	22.851	8.47418	23.0545	10.1798	1.00891	0.97121
ACADS_RAT	Short-chain specific acyl-CoA dehydrogenase, mitochondrial OS=Rattus norvegicus GN=Acads PE=1 SV=2	75.47	2	2	29.0911	4.00951	30.7397	2.1582	1.05667	0.373899
ACADV_RAT	Very long-chain specific acyl-CoA dehydrogenase, mitochondrial OS=Rattus norvegicus GN=Acadvl PE=1 SV=1	204.93	7	7	146.556	13.4358	150.609	20.2555	1.02766	0.759247
ACBP_RAT	Acyl-CoA-binding protein OS=Rattus norvegicus GN=Dbi PE=1 SV=3	68.5	2	2	49.1109	6.20091	50.2517	8.55649	1.02323	0.869304
ACON_RAT	Aconitate hydratase, mitochondrial OS=Rattus norvegicus GN=Aco2 PE=1 SV=2	1002.21	26	26	509.407	44.8658	564.28	71.1079	1.10772	0.168278
ACOT2_RAT	Acyl-coenzyme A thioesterase 2, mitochondrial OS=Rattus norvegicus GN=Acot2 PE=1 SV=1	70.3	2	2	14.6011	1.04896	15.9409	1.21749	1.09176	0.0836988
ACSL1_RAT	Long-chain-fatty-acid--CoA ligase 1 OS=Rattus norvegicus GN=Acsl1 PE=1 SV=1	272.93	11	11	103.739	7.50326	112.808	11.9807	1.08742	0.175943
ACTN1_RAT	Alpha-actinin-1 OS=Rattus norvegicus GN=Actn1 PE=1 SV=1	365.29	9	3	104.578	6.8544	104.638	7.66062	1.00057	0.999007
ACTN4_RAT	Alpha-actinin-4 OS=Rattus norvegicus GN=Actn4 PE=1 SV=2	247.42	8	2	77.3318	9.85162	84.0976	9.63104	1.08749	0.265644
ACTS_RAT	Actin, alpha skeletal muscle OS=Rattus norvegicus GN=Acta1 PE=2 SV=1	2070.47	32	32	3956.89	688.63	3998.32	1185.99	1.01047	0.893666
ADCK3_RAT	Chaperone activity of bc1 complex-like, mitochondrial OS=Rattus norvegicus GN=Adck3 PE=2 SV=1	78.85	2	2	18.8529	2.34885	19.6771	3.15483	1.04372	0.672934
ADHX_RAT	Alcohol dehydrogenase class-3 OS=Rattus norvegicus GN=Adh5 PE=1 SV=2	47.25	1	1	4.66585	0.386273	4.87619	0.544504	1.04508	0.518667
ADT1_RAT	ADP/ATP translocase 1 OS=Rattus norvegicus GN=Slc25a4 PE=1 SV=3	562.13	10	10	457.549	45.4214	528.893	40.4722	1.15593	0.0232357
ADT2_RAT	ADP/ATP translocase 2 OS=Rattus norvegicus GN=Slc25a5 PE=1 SV=3	24.18	2	2	4.96061	0.744657	4.77311	0.590201	1.03928	0.668586
AIFM1_RAT	Apoptosis-inducing factor 1, mitochondrial OS=Rattus norvegicus GN=Aifm1 PE=1 SV=1	69.85	4	4	35.7508	3.16546	40.1315	3.60439	1.12254	0.0611807
ALBU_RAT	Serum albumin OS=Rattus norvegicus GN=Alb PE=1 SV=2	1831.7	33	33	2018.31	213.762	1921.62	163.003	1.05032	0.423656
ALDH2_RAT	Aldehyde dehydrogenase, mitochondrial OS=Rattus norvegicus GN=Aldh2 PE=1 SV=1	100.62	4	4	46.3539	3.2861	46.4542	2.64571	1.00216	0.944406
ALDOA_RAT	Fructose-bisphosphate aldolase A OS=Rattus norvegicus GN=Aldoa PE=1 SV=2	1220.04	22	22	1002.65	136.423	1022.41	198.227	1.01971	0.897946
ALDOC_RAT	Fructose-bisphosphate aldolase C OS=Rattus norvegicus GN=Aldoc PE=1 SV=3	105.96	3	3	89.1342	17.4468	89.5761	17.6306	1.00496	0.962444
ALDR_RAT	Aldose reductase OS=Rattus norvegicus GN=Akr1b1 PE=1 SV=3	83.51	3	3	53.4812	5.43684	59.7674	7.90298	1.11754	0.157067
ANXA2_RAT	Annexin A2 OS=Rattus norvegicus GN=Anxa2 PE=1 SV=2	64.44	3	3	20.0844	1.16274	19.9039	0.709036	1.00907	0.776495
ANXA6_RAT	Annexin A6 OS=Rattus norvegicus GN=Anxa6 PE=1 SV=2	371.05	12	12	123.302	11.4612	127.429	9.64285	1.03347	0.513889
AT1A2_RAT;ATP4A_RAT	Sodium/potassium-transporting ATPase subunit alpha-2 OS=Rattus norvegicus GN=Atp1a2 PE=1 SV=1	110.85	3	3	8.13063	1.74963	9.70464	1.44392	1.19359	0.115479
AT2A1_RAT	Sarcoplasmic/endoplasmic reticulum calcium ATPase 1 OS=Rattus norvegicus GN=Atp2a1 PE=2 SV=1	997.15	23	13	161.241	34.0134	144.736	19.7995	1.11403	0.405927
AT2A2_RAT	Sarcoplasmic/endoplasmic reticulum calcium ATPase 2 OS=Rattus norvegicus GN=Atp2a2 PE=1 SV=1	1728.07	29	18	631.608	105.417	607.595	73.6598	1.03952	0.706853
ATP5H_RAT	ATP synthase subunit d, mitochondrial OS=Rattus norvegicus GN=Atp5h PE=1 SV=3	63.52	2	2	40.9612	2.83595	47.4675	3.39081	1.15884	0.00809192
ATP5I_RAT	ATP synthase subunit e, mitochondrial OS=Rattus norvegicus GN=Atp5i PE=1 SV=3	133.34	3	3	49.813	3.99601	53.2853	4.62395	1.06971	0.217949
ATP5J_RAT	ATP synthase-coupling factor 6, mitochondrial OS=Rattus norvegicus GN=Atp5j PE=1 SV=1	85.55	2	2	23.4553	2.65863	26.6512	2.24365	1.13625	0.0528599
ATPA_RAT	ATP synthase subunit alpha, mitochondrial OS=Rattus norvegicus GN=Atp5a1 PE=1 SV=2	882.09	19	19	565.981	49.0771	622.184	35.3728	1.0993	0.0532608
ATPB_RAT	ATP synthase subunit beta, mitochondrial OS=Rattus norvegicus GN=Atp5b PE=1 SV=2	1133.02	21	21	740.155	66.1191	843.708	69.395	1.13991	0.0325988
ATPD_RAT	ATP synthase subunit delta, mitochondrial OS=Rattus norvegicus GN=Atp5d PE=1 SV=2	77.14	1	1	3.75395	1.62558	5.31291	0.496089	1.41529	0.0780419
ATPG_RAT	ATP synthase subunit gamma, mitochondrial OS=Rattus norvegicus GN=Atp5c1 PE=1 SV=2	156.74	4	4	55.3999	6.46956	59.8382	5.16434	1.08011	0.220318
ATPO_RAT	ATP synthase subunit O, mitochondrial OS=Rattus norvegicus GN=Atp5o PE=1 SV=1	121.04	3	3	68.2137	3.39629	68.8683	3.47888	1.0096	0.760923
CABIN_RAT	Calcineurin-binding protein cabin-1 OS=Rattus norvegicus GN=Cabin1 PE=1 SV=1	16.3	1	1	46.9402	4.87172	48.9227	7.4867	1.04223	0.663702
CAH3_RAT	Carbonic anhydrase 3 OS=Rattus norvegicus GN=Ca3 PE=1 SV=3	1151.41	24	24	4949.85	562.28	5125.39	1350.53	1.03546	0.886896
CASQ1_RAT	Calsequestrin-1 (Fragment) OS=Rattus norvegicus GN=Casq1 PE=1 SV=1	47.76	1	1	18.8999	8.79334	20.6776	6.57124	1.09406	0.635244
CASQ2_RAT	Calsequestrin-2 OS=Rattus norvegicus GN=Casq2 PE=1 SV=2	85.06	4	4	26.9421	2.65364	25.5427	1.29523	1.05479	0.306529
CATA_RAT	Catalase OS=Rattus norvegicus GN=Cat PE=1 SV=3	46.55	2	2	9.56488	0.388381	10.0964	1.88094	1.05557	0.646284
CH60_RAT	60 kDa heat shock protein, mitochondrial OS=Rattus norvegicus GN=Hspd1 PE=1 SV=1	261.36	12	12	113.635	5.81745	118.253	4.91092	1.04064	0.186876
CISD1_RAT	CDGSH iron-sulfur domain-containing protein 1 OS=Rattus norvegicus GN=Cisd1 PE=3 SV=1	47.77	1	1	8.36288	0.707388	8.8886	0.74924	1.06286	0.25057
CISY_RAT	Citrate synthase, mitochondrial OS=Rattus norvegicus GN=Cs PE=1 SV=1	216.85	7	7	100.512	6.87102	109.947	11.881	1.09387	0.142608
CO1A1_RAT	Collagen alpha-1(I) chain OS=Rattus norvegicus GN=Col1a1 PE=1 SV=5	19.67	1	1	9.31034	1.08541	8.52314	2.59608	1.09236	0.482566
COF1_RAT	Cofilin-1 OS=Rattus norvegicus GN=Cfl1 PE=1 SV=3	104.34	3	3	35.1299	3.79018	38.4846	7.44574	1.09549	0.39378
COX2_RAT	Cytochrome c oxidase subunit 2 OS=Rattus norvegicus GN=Mtco2 PE=2 SV=2	110.51	4	4	50.9337	4.24996	58.1603	5.86343	1.14188	0.0458192
COX41_RAT	Cytochrome c oxidase subunit 4 isoform 1, mitochondrial OS=Rattus norvegicus GN=Cox4i1 PE=1 SV=1	158.82	5	5	68.7774	4.97843	79.3913	7.32929	1.15432	0.0206158
COX5A_RAT	Cytochrome c oxidase subunit 5A, mitochondrial OS=Rattus norvegicus GN=Cox5a PE=1 SV=1	82.72	3	3	100.979	9.93051	104.011	4.30237	1.03003	0.48189
CPT1B_RAT	Carnitine O-palmitoyltransferase 1, muscle isoform OS=Rattus norvegicus GN=Cpt1b PE=1 SV=1	117.68	6	6	43.3749	4.328	46.4204	5.81098	1.07021	0.371806
CRYAB_RAT	Alpha-crystallin B chain OS=Rattus norvegicus GN=Cryab PE=1 SV=1	364.37	6	6	454.275	92.8716	498.5	75.5502	1.09735	0.394548
CSRP3_RAT	Cysteine and glycine-rich protein 3 OS=Rattus norvegicus GN=Csrp3 PE=1 SV=1	186.14	6	6	67.1635	14.5197	63.8859	6.42281	1.0513	0.696317
CYC_RAT	Cytochrome c, somatic OS=Rattus norvegicus GN=Cycs PE=1 SV=2	74.11	3	3	56.953	5.00798	63.3599	5.45547	1.11249	0.0789709
DESM_RAT	Desmin OS=Rattus norvegicus GN=Des PE=2 SV=2	695	15	15	204.285	17.6694	198.468	24.7203	1.02931	0.638142
DHE3_RAT	Glutamate dehydrogenase 1, mitochondrial OS=Rattus norvegicus GN=Glud1 PE=1 SV=2	99.09	4	4	32.5127	1.99487	27.9236	5.57198	1.16434	0.143363
DHSA_RAT	Succinate dehydrogenase [ubiquinone] flavoprotein subunit, mitochondrial OS=Rattus norvegicus GN=Sdha PE=1 SV=1	161.35	3	3	36.905	2.2452	36.9273	2.12518	1.0006	0.984029
DHSB_RAT	Succinate dehydrogenase [ubiquinone] iron-sulfur subunit, mitochondrial OS=Rattus norvegicus GN=Sdhb PE=2 SV=2	153.49	6	6	49.0442	5.96162	49.4998	6.11415	1.00929	0.89601
DLDH_RAT	Dihydrolipoyl dehydrogenase, mitochondrial OS=Rattus norvegicus GN=Dld PE=1 SV=1	184.2	6	6	57.8254	3.80225	66.7798	4.94821	1.15485	0.00771992
DOPD_RAT	D-dopachrome decarboxylase OS=Rattus norvegicus GN=Ddt PE=1 SV=3	42.63	2	2	18.8789	1.48385	21.0482	3.27503	1.11491	0.247479
DYL2_RAT	Dynein light chain 2, cytoplasmic OS=Rattus norvegicus GN=Dynll2 PE=1 SV=1	45.5	1	1	3.66043	0.797231	3.95831	0.806465	1.08138	0.550176
ECHA_RAT	Trifunctional enzyme subunit alpha, mitochondrial OS=Rattus norvegicus GN=Hadha PE=1 SV=2	212.13	5	5	35.5012	3.59745	38.9553	2.21757	1.0973	0.0830777
ECHB_RAT	Trifunctional enzyme subunit beta, mitochondrial OS=Rattus norvegicus GN=Hadhb PE=1 SV=1	312.76	8	8	147.04	3.52381	159.119	13.1651	1.08214	0.0779475
ECHM_RAT	Enoyl-CoA hydratase, mitochondrial OS=Rattus norvegicus GN=Echs1 PE=1 SV=1	76.21	3	3	21.7628	2.1651	25.9691	3.10816	1.19328	0.0244936
ECI1_RAT	Enoyl-CoA delta isomerase 1, mitochondrial OS=Rattus norvegicus GN=Eci1 PE=1 SV=1	148.12	5	5	53.362	5.46171	61.0432	6.15722	1.14395	0.0609505
ECI2_RAT	Enoyl-CoA delta isomerase 2, mitochondrial OS=Rattus norvegicus GN=Eci2 PE=1 SV=1	40.28	1	1	1.9982	0.589207	1.9398	0.318337	1.03011	0.92754
EF1A1_RAT	Elongation factor 1-alpha 1 OS=Rattus norvegicus GN=Eef1a1 PE=1 SV=1	75.68	2	2	53.9864	6.47819	54.0786	4.43899	1.00171	0.941077
EF1A2_RAT	Elongation factor 1-alpha 2 OS=Rattus norvegicus GN=Eef1a2 PE=2 SV=1	193.47	7	7	103.743	12.5483	101.961	14.8303	1.01748	0.810322
EF2_RAT	Elongation factor 2 OS=Rattus norvegicus GN=Eef2 PE=1 SV=4	171.74	7	7	102.269	4.88802	103.907	11.0025	1.01601	0.805715
ENOA_RAT	Alpha-enolase OS=Rattus norvegicus GN=Eno1 PE=1 SV=4	525.5	13	5	65.5948	6.40793	72.4309	6.00583	1.10422	0.101065
ENOB_RAT	Beta-enolase OS=Rattus norvegicus GN=Eno3 PE=1 SV=3	758.31	19	12	430.26	24.7968	425.582	79.951	1.01099	0.78587
ES1_RAT	ES1 protein homolog, mitochondrial OS=Rattus norvegicus PE=1 SV=2	36.64	2	2	20.9985	2.17691	22.9064	2.01677	1.09086	0.164941
ETFA_RAT	Electron transfer flavoprotein subunit alpha, mitochondrial OS=Rattus norvegicus GN=Etfa PE=1 SV=4	294.91	8	8	135.415	9.42963	148.696	14.0556	1.09808	0.0994415
ETFB_RAT	Electron transfer flavoprotein subunit beta OS=Rattus norvegicus GN=Etfb PE=2 SV=3	279.27	8	8	113.227	8.64286	128.034	10.4311	1.13077	0.0321052
ETFD_RAT	Electron transfer flavoprotein-ubiquinone oxidoreductase, mitochondrial OS=Rattus norvegicus GN=Etfdh PE=2 SV=1	61.44	2	2	14.5426	2.51988	14.2684	0.983427	1.01922	0.904153
FABP4_RAT	Fatty acid-binding protein, adipocyte OS=Rattus norvegicus GN=Fabp4 PE=1 SV=3	94.85	4	4	48.0624	5.198	55.4663	5.72988	1.15405	0.0426122
FABPH_RAT	Fatty acid-binding protein, heart OS=Rattus norvegicus GN=Fabp3 PE=1 SV=2	348.73	7	7	328.717	62.3439	504.97	116.513	1.53618	0.00637915
FHL1_RAT	Four and a half LIM domains protein 1 OS=Rattus norvegicus GN=Fhl1 PE=2 SV=1	639.45	17	17	768.79	146.192	805.705	99.463	1.04802	0.572483
FMOD_RAT	Fibromodulin OS=Rattus norvegicus GN=Fmod PE=2 SV=1	137.34	4	4	51.4931	4.44055	46.6472	5.363	1.10388	0.13756
FUMH_RAT	Fumarate hydratase, mitochondrial OS=Rattus norvegicus GN=Fh PE=1 SV=1	328.11	7	7	103.132	9.94192	114.219	8.61047	1.1075	0.0734139
G3P_RAT;G3PT_RAT	Glyceraldehyde-3-phosphate dehydrogenase OS=Rattus norvegicus GN=Gapdh PE=1 SV=3	884.55	14	14	1067.16	123.816	1145.79	205.985	1.07369	0.487898
G6PI_RAT	Glucose-6-phosphate isomerase OS=Rattus norvegicus GN=Gpi PE=1 SV=1	316.25	6	6	73.3233	1.50894	75.6798	9.62607	1.03214	0.656911
GDIB_RAT	Rab GDP dissociation inhibitor beta OS=Rattus norvegicus GN=Gdi2 PE=1 SV=2	78.25	3	3	26.2541	6.13507	28.0238	4.28187	1.06741	0.525581
GDIR1_RAT	Rho GDP-dissociation inhibitor 1 OS=Rattus norvegicus GN=Arhgdia PE=1 SV=1	84.43	4	4	37.0912	4.9737	38.8519	4.156	1.04747	0.514209
GPX1_RAT	Glutathione peroxidase 1 OS=Rattus norvegicus GN=Gpx1 PE=1 SV=4	152.32	5	5	83.1616	13.5896	88.8416	13.3398	1.0683	0.479176
GRP75_RAT	Stress-70 protein, mitochondrial OS=Rattus norvegicus GN=Hspa9 PE=1 SV=3	228.91	9	9	74.9626	5.83169	76.7064	5.92511	1.02326	0.637151
GRP78_RAT	78 kDa glucose-regulated protein OS=Rattus norvegicus GN=Hspa5 PE=1 SV=1	186.89	4	3	11.9675	1.90269	11.3767	0.491849	1.05192	0.549404
GSTM4_RAT	Glutathione S-transferase Yb-3 OS=Rattus norvegicus GN=Gstm3 PE=1 SV=2	106.77	5	5	57.1339	4.02352	66.6383	13.2907	1.16635	0.154638
GSTP1_RAT	Glutathione S-transferase P OS=Rattus norvegicus GN=Gstp1 PE=1 SV=2	109.03	2	2	12.7401	1.02026	12.8954	0.699188	1.01219	0.746301
H2A1C_RAT	Histone H2A type 1-C OS=Rattus norvegicus PE=1 SV=2	38.9	1	1	21.4371	2.72181	19.8724	3.60343	1.07874	0.423697
H2B1_RAT	Histone H2B type 1 OS=Rattus norvegicus PE=1 SV=2	34.61	1	1	57.3874	3.72125	55.2391	4.24546	1.03889	0.3969
H4_RAT	Histone H4 OS=Rattus norvegicus GN=Hist1h4b PE=1 SV=2	186.82	3	3	72.1948	8.50081	64.8653	7.70233	1.113	0.167699
HBA_RAT	Hemoglobin subunit alpha-1/2 OS=Rattus norvegicus GN=Hba1 PE=1 SV=3	477.69	8	8	799.041	281.592	920.766	197.222	1.15234	0.345917
HBB1_RAT	Hemoglobin subunit beta-1 OS=Rattus norvegicus GN=Hbb PE=1 SV=3	847.18	15	5	892.73	329.673	1077.12	208.995	1.20655	0.226111
HBB2_RAT	Hemoglobin subunit beta-2 OS=Rattus norvegicus PE=1 SV=2	734.55	17	5	128.938	43.5558	136.135	31.646	1.05582	0.654245
HCD2_RAT	3-hydroxyacyl-CoA dehydrogenase type-2 OS=Rattus norvegicus GN=Hsd17b10 PE=1 SV=3	60.2	1	1	8.17496	1.39087	8.88607	0.845872	1.08699	0.297367
HEMO_RAT	Hemopexin OS=Rattus norvegicus GN=Hpx PE=1 SV=3	137.37	5	5	78.7347	5.48177	76.2137	6.74987	1.03308	0.501587
HS90A_RAT	Heat shock protein HSP 90-alpha OS=Rattus norvegicus GN=Hsp90aa1 PE=1 SV=3	127.28	3	1	9.80509	1.07317	10.5391	2.01837	1.07486	0.571642
HS90B_RAT	Heat shock protein HSP 90-beta OS=Rattus norvegicus GN=Hsp90ab1 PE=1 SV=4	461.53	15	13	88.6232	12.9229	93.4453	8.09399	1.05441	0.43319
HSP71_RAT	Heat shock 70 kDa protein 1A/1B OS=Rattus norvegicus GN=Hspa1a PE=2 SV=2	220.59	5	5	42.3871	5.64337	44.6546	3.63408	1.0535	0.397501
HSP72_RAT	Heat shock-related 70 kDa protein 2 OS=Rattus norvegicus GN=Hspa2 PE=2 SV=2	290.07	6	1	16.0599	1.80186	16.0243	2.2129	1.00222	0.940141
HSP74_RAT	Heat shock 70 kDa protein 4 OS=Rattus norvegicus GN=Hspa4 PE=1 SV=1	33.91	2	2	1.96936	0.484571	1.97907	0.599454	1.00493	0.927066
HSP7C_RAT	Heat shock cognate 71 kDa protein OS=Rattus norvegicus GN=Hspa8 PE=1 SV=1	729.13	15	9	119.414	11.259	120.399	10.2884	1.00824	0.872331
HSPB1_RAT	Heat shock protein beta-1 OS=Rattus norvegicus GN=Hspb1 PE=1 SV=1	246.93	7	7	129.546	23.8082	130.507	16.511	1.00742	0.877997
HSPB2_RAT	Heat shock protein beta-2 OS=Rattus norvegicus GN=Hspb2 PE=2 SV=1	34.81	1	1	9.75745	0.460863	9.12788	1.07527	1.06897	0.239016
HSPB6_RAT	Heat shock protein beta-6 OS=Rattus norvegicus GN=Hspb6 PE=1 SV=1	180.48	4	4	192.655	52.2963	214.806	41.6219	1.11498	0.382503
HSPB7_RAT	Heat shock protein beta-7 (Fragment) OS=Rattus norvegicus GN=Hspb7 PE=2 SV=1	70.59	2	2	31.3785	3.42461	33.7817	4.47604	1.07659	0.332825
IDH3A_RAT	Isocitrate dehydrogenase [NAD] subunit alpha, mitochondrial OS=Rattus norvegicus GN=Idh3a PE=1 SV=1	184.45	4	4	36.3789	2.68619	36.4888	2.69988	1.00302	0.950848
IDHP_RAT	Isocitrate dehydrogenase [NADP], mitochondrial OS=Rattus norvegicus GN=Idh2 PE=1 SV=2	902.93	18	18	467.95	40.6191	517.506	86.8455	1.1059	0.272195
IGG2A_RAT	Ig gamma-2A chain C region OS=Rattus norvegicus GN=Igg-2a PE=1 SV=1	98.27	3	3	50.2407	6.33176	50.2082	3.84564	1.00065	0.958853
K2C1B_RAT	Keratin, type II cytoskeletal 1b OS=Rattus norvegicus GN=Krt77 PE=2 SV=1	27.57	2	2	54.9847	8.85259	50.6548	3.59011	1.08548	0.354696
K6PF_RAT	6-phosphofructokinase, muscle type OS=Rattus norvegicus GN=Pfkm PE=2 SV=3	171.88	7	7	49.9673	2.99609	47.4201	3.93865	1.05372	0.25459
KAD1_RAT	Adenylate kinase isoenzyme 1 OS=Rattus norvegicus GN=Ak1 PE=1 SV=3	42.21	1	1	21.0781	3.30921	23.1624	1.93071	1.09889	0.209879
KBTBA_RAT	Kelch repeat and BTB domain-containing protein 10 OS=Rattus norvegicus GN=Kbtbd10 PE=1 SV=1	249.44	6	6	90.8831	7.84298	87.6417	3.59679	1.03698	0.396986
KCRM_RAT	Creatine kinase M-type OS=Rattus norvegicus GN=Ckm PE=1 SV=2	1019.98	20	20	2584.26	328.206	2661.84	413.099	1.03002	0.761719
KCRS_RAT	Creatine kinase S-type, mitochondrial OS=Rattus norvegicus GN=Ckmt2 PE=1 SV=2	749.88	19	19	601.44	63.5428	646.133	64.2678	1.07431	0.279094
KPYM_RAT	Pyruvate kinase isozymes M1/M2 OS=Rattus norvegicus GN=Pkm2 PE=1 SV=3	1008.25	19	19	341.657	32.5487	333.509	35.3514	1.02443	0.694277
LDHA_RAT	L-lactate dehydrogenase A chain OS=Rattus norvegicus GN=Ldha PE=1 SV=1	342.94	10	7	124.916	13.4961	119.446	11.7016	1.0458	0.503753
LDHB_RAT	L-lactate dehydrogenase B chain OS=Rattus norvegicus GN=Ldhb PE=1 SV=2	622.62	13	11	390.482	47.1581	468.704	99.3719	1.20032	0.127742
LEG1_RAT	Galectin-1 OS=Rattus norvegicus GN=Lgals1 PE=1 SV=2	112.42	2	2	21.8098	2.94011	23.4462	1.88659	1.07503	0.263937
MDHC_RAT	Malate dehydrogenase, cytoplasmic OS=Rattus norvegicus GN=Mdh1 PE=1 SV=3	642.83	14	14	387.092	41.8868	435.709	74.6299	1.1256	0.231412
MDHM_RAT	Malate dehydrogenase, mitochondrial OS=Rattus norvegicus GN=Mdh2 PE=1 SV=2	796.36	14	14	547.219	42.4647	608.301	62.0036	1.11162	0.0921899
MIF_RAT	Macrophage migration inhibitory factor OS=Rattus norvegicus GN=Mif PE=1 SV=4	95.79	2	2	37.4103	2.20845	38.3006	4.07296	1.0238	0.710961
MLRS_RAT	Myosin regulatory light chain 2, skeletal muscle isoform OS=Rattus norvegicus GN=Mylpf PE=2 SV=2	321.46	10	10	103.71	27.4532	92.5745	20.9267	1.12028	0.47821
MLRV_RAT	Myosin regulatory light chain 2, ventricular/cardiac muscle isoform OS=Rattus norvegicus GN=Myl2 PE=1 SV=2	319.07	5	5	385.193	78.9831	430.65	143.271	1.11801	0.728234
MMSA_RAT	Methylmalonate-semialdehyde dehydrogenase [acylating], mitochondrial OS=Rattus norvegicus GN=Aldh6a1 PE=1 SV=1	114.96	5	5	55.5897	2.00775	58.6251	1.71364	1.0546	0.0234995
MPCP_RAT	Phosphate carrier protein, mitochondrial OS=Rattus norvegicus GN=Slc25a3 PE=1 SV=1	138.48	5	5	53.7511	6.53357	58.4621	4.68569	1.08764	0.186557
MRCKA_RAT	Serine/threonine-protein kinase MRCK alpha OS=Rattus norvegicus GN=Cdc42bpa PE=1 SV=1	55.33	3	3	15.8936	1.85216	15.3853	2.35189	1.03304	0.678687
MYG_RAT	Myoglobin OS=Rattus norvegicus GN=Mb PE=1 SV=3	709.77	10	10	2103.52	379.586	2347.98	225.231	1.11621	0.20066
MYH6_RAT	Myosin-6 OS=Rattus norvegicus GN=Myh6 PE=2 SV=2	126.05	3	3	88.121	13.0809	89.3056	27.2513	1.01344	0.891706
MYH7_RAT	Myosin-7 OS=Rattus norvegicus GN=Myh7 PE=2 SV=2	6860.69	135	135	5843.77	896.86	5777.81	1943.4	1.01142	0.754217
MYH8_RAT	Myosin-8 (Fragment) OS=Rattus norvegicus GN=Myh8 PE=2 SV=1	201.37	4	4	56.3093	15.5074	49.1844	14.2921	1.14486	0.436694
MYL1_RAT	Myosin light chain 1/3, skeletal muscle isoform OS=Rattus norvegicus GN=Myl1 PE=1 SV=2	363.88	7	7	109.934	27.6336	94.8647	20.1349	1.15885	0.359555
MYL3_RAT	Myosin light chain 3 OS=Rattus norvegicus GN=Myl3 PE=1 SV=2	922.53	17	17	1115.52	197.992	1181.19	335.897	1.05887	0.870941
MYL6_RAT	Myosin light polypeptide 6 OS=Rattus norvegicus GN=Myl6 PE=1 SV=3	122.21	4	4	75.9794	16.5697	86.7968	26.4555	1.14237	0.557644
MYPC1_RAT	Myosin-binding protein C, slow-type (Fragment) OS=Rattus norvegicus GN=Mybpc1 PE=2 SV=1	345.34	9	9	105.161	13.6371	108.617	20.8044	1.03287	0.834391
NDKB_RAT	Nucleoside diphosphate kinase B OS=Rattus norvegicus GN=Nme2 PE=1 SV=1	152.73	6	6	139.924	19.1201	155.088	25.1254	1.10837	0.286819
NDRG2_RAT	Protein NDRG2 OS=Rattus norvegicus GN=Ndrg2 PE=1 SV=1	99.87	4	4	17.3087	2.17162	19.01	3.15232	1.09829	0.338562
NDUAA_RAT	NADH dehydrogenase [ubiquinone] 1 alpha subcomplex subunit 10, mitochondrial OS=Rattus norvegicus GN=Ndufa10 PE=1 SV=1	92.71	3	3	24.1491	1.81413	25.3767	2.3359	1.05083	0.356012
NDUAB_RAT	NADH dehydrogenase [ubiquinone] 1 alpha subcomplex subunit 11 OS=Rattus norvegicus GN=Ndufa11 PE=2 SV=1	34.57	1	1	10.0244	0.455971	10.8659	1.06819	1.08395	0.127338
NDUS1_RAT	NADH-ubiquinone oxidoreductase 75 kDa subunit, mitochondrial OS=Rattus norvegicus GN=Ndufs1 PE=1 SV=1	264.63	8	8	32.976	2.92178	34.889	3.05068	1.05801	0.303354
NDUV2_RAT	NADH dehydrogenase [ubiquinone] flavoprotein 2, mitochondrial OS=Rattus norvegicus GN=Ndufv2 PE=1 SV=2	62.84	3	3	30.2021	1.34861	30.3316	2.80709	1.00429	0.972808
ODFP2_RAT	Outer dense fiber protein 2 OS=Rattus norvegicus GN=Odf2 PE=1 SV=2	78.39	5	2	35.84	7.97593	36.9584	4.77786	1.03121	0.694144
ODO1_RAT	2-oxoglutarate dehydrogenase, mitochondrial OS=Rattus norvegicus GN=Ogdh PE=1 SV=1	236.54	13	13	90.0705	7.82095	97.2989	4.96122	1.08025	0.087205
ODO2_RAT	Dihydrolipoyllysine-residue succinyltransferase component of 2-oxoglutarate dehydrogenase complex, mitochondrial OS=Rattus norvegicus GN=Dlst PE=1 SV=2	108.45	2	2	15.6923	1.73491	17.698	1.49327	1.12781	0.0684371
ODPA_RAT	Pyruvate dehydrogenase E1 component subunit alpha, somatic form, mitochondrial OS=Rattus norvegicus GN=Pdha1 PE=1 SV=2	176.02	5	5	571.596	79.8774	560.341	152.371	1.02009	0.74965
ODPB_RAT	Pyruvate dehydrogenase E1 component subunit beta, mitochondrial OS=Rattus norvegicus GN=Pdhb PE=1 SV=2	257.44	7	7	61.5825	3.17226	64.8201	4.99805	1.05257	0.243979
PADI2_RAT	Protein-arginine deiminase type-2 OS=Rattus norvegicus GN=Padi2 PE=1 SV=1	81.17	3	3	14.7814	0.859907	12.9895	2.16282	1.13795	0.140735
PARK7_RAT	Protein DJ-1 OS=Rattus norvegicus GN=Park7 PE=1 SV=1	130.58	6	6	66.269	4.66318	69.8713	6.35308	1.05436	0.30785
PDLI3_RAT	PDZ and LIM domain protein 3 OS=Rattus norvegicus GN=Pdlim3 PE=1 SV=2	118.11	4	4	35.9536	3.32049	34.2281	1.88056	1.05041	0.323134
PDLI5_RAT	PDZ and LIM domain protein 5 OS=Rattus norvegicus GN=Pdlim5 PE=1 SV=2	110.62	5	5	73.7476	10.1252	83.418	14.2646	1.13113	0.244113
PEBP1_RAT	Phosphatidylethanolamine-binding protein 1 OS=Rattus norvegicus GN=Pebp1 PE=1 SV=3	405.92	13	13	236.839	14.3723	259.027	39.2848	1.09369	0.258348
PGAM2_RAT	Phosphoglycerate mutase 2 OS=Rattus norvegicus GN=Pgam2 PE=2 SV=2	243.3	5	5	173.145	18.4189	175.181	27.1729	1.01176	0.930952
PGK1_RAT	Phosphoglycerate kinase 1 OS=Rattus norvegicus GN=Pgk1 PE=1 SV=2	595.6	15	15	273.44	28.1679	279.297	30.4433	1.02142	0.758118
PGM1_RAT	Phosphoglucomutase-1 OS=Rattus norvegicus GN=Pgm1 PE=1 SV=2	513.78	14	14	96.2505	7.78386	94.8673	11.4024	1.01458	0.779807
PO210_RAT	Nuclear pore membrane glycoprotein 210 OS=Rattus norvegicus GN=Pom210 PE=1 SV=1	30.4	1	1	2.12269	1.46229	2.4177	1.82031	1.13898	0.814423
PPAC_RAT	Low molecular weight phosphotyrosine protein phosphatase OS=Rattus norvegicus GN=Acp1 PE=1 SV=3	33.87	1	1	7.20483	1.57806	7.51822	0.723949	1.0435	0.569362
PPIA_RAT	Peptidyl-prolyl cis-trans isomerase A OS=Rattus norvegicus GN=Ppia PE=1 SV=2	83	4	4	35.4991	1.90172	34.5631	1.88617	1.02708	0.427161
PRDX1_RAT	Peroxiredoxin-1 OS=Rattus norvegicus GN=Prdx1 PE=1 SV=1	153.65	7	7	90.3095	6.34444	95.5137	7.73482	1.05763	0.248407
PRDX2_RAT	Peroxiredoxin-2 OS=Rattus norvegicus GN=Prdx2 PE=1 SV=3	49.56	2	2	8.51216	0.812893	8.61656	1.25686	1.01226	0.919686
PRDX3_RAT	Thioredoxin-dependent peroxide reductase, mitochondrial OS=Rattus norvegicus GN=Prdx3 PE=1 SV=2	70.89	2	2	13.7319	0.778646	14.0166	1.27005	1.02073	0.722613
PRDX5_RAT	Peroxiredoxin-5, mitochondrial OS=Rattus norvegicus GN=Prdx5 PE=1 SV=1	178.47	6	6	86.271	5.31687	91.3707	8.31251	1.05911	0.272585
PRDX6_RAT	Peroxiredoxin-6 OS=Rattus norvegicus GN=Prdx6 PE=1 SV=3	112.18	3	3	29.7925	3.1525	31.121	2.78176	1.04459	0.455201
PRELP_RAT	Prolargin OS=Rattus norvegicus GN=Prelp PE=2 SV=1	108.84	3	3	37.6426	4.18345	36.2719	2.57397	1.03779	0.538532
PROF1_RAT	Profilin-1 OS=Rattus norvegicus GN=Pfn1 PE=1 SV=2	97.79	3	3	37.0034	4.1929	36.716	3.41922	1.00783	0.922453
PROF2_RAT	Profilin-2 OS=Rattus norvegicus GN=Pfn2 PE=1 SV=3	66.93	1	1	6.68133	0.986798	7.62358	0.908077	1.14103	0.121845
PTGR2_RAT	Prostaglandin reductase 2 OS=Rattus norvegicus GN=Ptgr2 PE=2 SV=2	34.86	1	1	2.97351	0.57009	2.51929	0.399375	1.1803	0.164341
PTRF_RAT	Polymerase I and transcript release factor OS=Rattus norvegicus GN=Ptrf PE=1 SV=1	184.14	4	4	28.7155	2.0786	31.885	4.15569	1.11038	0.156417
PYGB_RAT	Glycogen phosphorylase, brain form (Fragment) OS=Rattus norvegicus GN=Pygb PE=1 SV=3	118.17	5	5	67.8667	11.0099	67.0023	9.30319	1.0129	0.906899
PYGM_RAT	Glycogen phosphorylase, muscle form OS=Rattus norvegicus GN=Pygm PE=2 SV=5	501.4	16	16	351.923	54.5467	367.506	35.8078	1.04428	0.535881
QCR1_RAT	Cytochrome b-c1 complex subunit 1, mitochondrial OS=Rattus norvegicus GN=Uqcrc1 PE=1 SV=1	322.07	11	11	109.874	8.75759	121.259	5.03941	1.10361	0.0273652
QCR2_RAT	Cytochrome b-c1 complex subunit 2, mitochondrial OS=Rattus norvegicus GN=Uqcrc2 PE=1 SV=2	458.56	15	15	166.771	10.584	182.254	8.73782	1.09284	0.0290126
SAHH_RAT	Adenosylhomocysteinase OS=Rattus norvegicus GN=Ahcy PE=1 SV=3	36.3	1	1	6.71237	1.75259	8.3871	2.84842	1.2495	0.325387
SCG1_RAT	Secretogranin-1 OS=Rattus norvegicus GN=Chgb PE=1 SV=2	40.01	3	3	88.1773	13.3096	89.3351	11.9129	1.01313	0.862776
SCOT1_RAT	Succinyl-CoA:3-ketoacid-coenzyme A transferase 1, mitochondrial OS=Rattus norvegicus GN=Oxct1 PE=1 SV=1	135.65	6	6	132.816	3.35855	136.171	12.0365	1.02526	0.593545
SLMAP_RAT	Sarcolemmal membrane-associated protein OS=Rattus norvegicus GN=Slmap PE=3 SV=1	43.39	1	1	5.66164	0.602582	5.37517	0.726289	1.0533	0.485653
SMPX_RAT	Small muscular protein OS=Rattus norvegicus GN=Smpx PE=2 SV=1	79.36	1	1	2.33235	0.991119	2.58377	0.382373	1.1078	0.43544
SODC_RAT	Superoxide dismutase [Cu-Zn] OS=Rattus norvegicus GN=Sod1 PE=1 SV=2	89.75	2	2	22.428	2.58399	22.1421	2.52465	1.01291	0.857877
SODM_RAT	Superoxide dismutase [Mn], mitochondrial OS=Rattus norvegicus GN=Sod2 PE=1 SV=2	74.63	3	3	7.63767	0.871205	7.77156	1.41265	1.01753	0.949627
TBA3_RAT	Tubulin alpha-3 chain OS=Rattus norvegicus GN=Tuba3a PE=2 SV=1	222.77	7	1	15.4749	1.25592	15.6694	1.62873	1.01257	0.856131
TBA4A_RAT	Tubulin alpha-4A chain OS=Rattus norvegicus GN=Tuba4a PE=2 SV=1	419.74	10	4	45.6153	7.24729	45.0636	3.74201	1.01224	0.943526
TBB2C_RAT	Tubulin beta-2C chain OS=Rattus norvegicus GN=Tubb2c PE=1 SV=1	572.66	14	5	74.8516	10.9987	79.164	6.48783	1.05761	0.388726
THIL_RAT	Acetyl-CoA acetyltransferase, mitochondrial OS=Rattus norvegicus GN=Acat1 PE=1 SV=1	256.45	6	6	73.9472	4.74448	79.9376	4.41272	1.08101	0.0628432
THIM_RAT	3-ketoacyl-CoA thiolase, mitochondrial OS=Rattus norvegicus GN=Acaa2 PE=1 SV=1	395.98	7	7	89.2139	10.5636	111.883	11.4466	1.25409	0.00714497
THIO_RAT	Thioredoxin OS=Rattus norvegicus GN=Txn PE=1 SV=2	78.18	1	1	15.8721	1.7424	17.0977	2.6102	1.07722	0.408175
TNNI1_RAT	Troponin I, slow skeletal muscle OS=Rattus norvegicus GN=Tnni1 PE=1 SV=2	158.51	2	2	75.6233	10.6255	78.2732	21.5635	1.03504	0.948856
TNNI2_RAT	Troponin I, fast skeletal muscle OS=Rattus norvegicus GN=Tnni2 PE=2 SV=2	35.11	1	1	10.7581	2.28252	8.01442	2.11109	1.34234	0.0992837
TNNT1_RAT	Troponin T, slow skeletal muscle OS=Rattus norvegicus GN=Tnnt1 PE=2 SV=3	300.17	9	9	193.427	23.6	199.821	40.3691	1.03306	0.859544
TNNT3_RAT	Troponin T, fast skeletal muscle OS=Rattus norvegicus GN=Tnnt3 PE=2 SV=2	83.96	3	3	26.7203	2.86181	25.042	1.43244	1.06702	0.255231
TPIS_RAT	Triosephosphate isomerase OS=Rattus norvegicus GN=Tpi1 PE=1 SV=2	729.58	9	9	485.963	48.702	473.436	81.142	1.02646	0.695711
TPM1_RAT	Tropomyosin alpha-1 chain OS=Rattus norvegicus GN=Tpm1 PE=1 SV=3	598.4	10	4	82.6703	12.8205	83.1611	20.2609	1.00594	0.921148
TPM2_RAT	Tropomyosin beta chain OS=Rattus norvegicus GN=Tpm2 PE=2 SV=1	727.78	10	6	227.751	37.3246	221.296	59.5413	1.02917	0.738456
TPM3_RAT	Tropomyosin alpha-3 chain OS=Rattus norvegicus GN=Tpm3 PE=1 SV=2	434.1	6	2	69.3976	12.6701	76.9526	23.91	1.10887	0.66574
TRFE_RAT	Serotransferrin OS=Rattus norvegicus GN=Tf PE=1 SV=3	654.5	17	17	203.371	25.5631	203.275	13.3639	1.00047	0.947126
TRI72_RAT	Tripartite motif-containing protein 72 OS=Rattus norvegicus GN=Trim72 PE=2 SV=1	516.27	11	11	137.631	6.45064	138.166	7.70978	1.00389	0.914568
TRY1_RAT	Anionic trypsin-1 OS=Rattus norvegicus GN=Prss1 PE=1 SV=1	117.92	3	3	49.6006	17.8495	58.0719	9.05611	1.17079	0.253495
UBA1_RAT	Ubiquitin-like modifier-activating enzyme 1 OS=Rattus norvegicus GN=Uba1 PE=1 SV=1	85.73	3	3	14.5845	1.26739	15.5021	1.6915	1.06291	0.358937
UBB_RAT	Polyubiquitin-B OS=Rattus norvegicus GN=Ubb PE=1 SV=1	173.32	3	3	59.747	8.5874	63.2876	5.91781	1.05926	0.42245
UCRI_RAT	Cytochrome b-c1 complex subunit Rieske, mitochondrial OS=Rattus norvegicus GN=Uqcrfs1 PE=1 SV=2	69.31	1	1	10.6079	1.88983	11.3238	2.23022	1.06749	0.655967
USMG5_RAT	Up-regulated during skeletal muscle growth protein 5 OS=Rattus norvegicus GN=Usmg5 PE=2 SV=1	34.75	1	1	12.044	0.910811	11.6629	1.48669	1.03268	0.594013
VDAC1_RAT	Voltage-dependent anion-selective channel protein 1 OS=Rattus norvegicus GN=Vdac1 PE=1 SV=4	411.6	12	12	197.727	13.1302	221.165	11.3294	1.11854	0.0111131
VDAC2_RAT	Voltage-dependent anion-selective channel protein 2 OS=Rattus norvegicus GN=Vdac2 PE=1 SV=2	184.75	5	5	43.1189	1.09189	41.0961	2.45039	1.04922	0.124803
VDAC3_RAT	Voltage-dependent anion-selective channel protein 3 OS=Rattus norvegicus GN=Vdac3 PE=1 SV=2	53.04	4	4	45.8235	3.71725	52.9407	3.9031	1.15532	0.013673
VIME_RAT	Vimentin OS=Rattus norvegicus GN=Vim PE=1 SV=2	294.73	9	9	61.3403	7.40448	60.9928	6.37283	1.0057	0.940503

## Sheet: Publication table
Description	Accession	Confidence score	Peptide count	Peptides used for quantitation	LCR Mean	LCR SD	HCR Mean	HCR SD	Max fold change	Anova (p)
Fatty acid-binding protein, heart OS=Rattus norvegicus GN=Fabp3 PE=1 SV=2	FABPH_RAT	348.73	7	7	328.717	62.3439	504.97	116.513	1.53618	0.00637915
3-ketoacyl-CoA thiolase, mitochondrial OS=Rattus norvegicus GN=Acaa2 PE=1 SV=1	THIM_RAT	395.98	7	7	89.2139	10.5636	111.883	11.4466	1.25409	0.00714497
Dihydrolipoyl dehydrogenase, mitochondrial OS=Rattus norvegicus GN=Dld PE=1 SV=1	DLDH_RAT	184.2	6	6	57.8254	3.80225	66.7798	4.94821	1.15485	0.00771992
ATP synthase subunit d, mitochondrial OS=Rattus norvegicus GN=Atp5h PE=1 SV=3	ATP5H_RAT	63.52	2	2	40.9612	2.83595	47.4675	3.39081	1.15884	0.00809192
Voltage-dependent anion-selective channel protein 1 OS=Rattus norvegicus GN=Vdac1 PE=1 SV=4	VDAC1_RAT	411.6	12	12	197.727	13.1302	221.165	11.3294	1.11854	0.0111131
Voltage-dependent anion-selective channel protein 3 OS=Rattus norvegicus GN=Vdac3 PE=1 SV=2	VDAC3_RAT	53.04	4	4	45.8235	3.71725	52.9407	3.9031	1.15532	0.013673
Cytochrome c oxidase subunit 4 isoform 1, mitochondrial OS=Rattus norvegicus GN=Cox4i1 PE=1 SV=1	COX41_RAT	158.82	5	5	68.7774	4.97843	79.3913	7.32929	1.15432	0.0206158
ADP/ATP translocase 1 OS=Rattus norvegicus GN=Slc25a4 PE=1 SV=3	ADT1_RAT	562.13	10	10	457.549	45.4214	528.893	40.4722	1.15593	0.0232357
Methylmalonate-semialdehyde dehydrogenase [acylating], mitochondrial OS=Rattus norvegicus GN=Aldh6a1 PE=1 SV=1	MMSA_RAT	114.96	5	5	55.5897	2.00775	58.6251	1.71364	1.0546	0.0234995
Enoyl-CoA hydratase, mitochondrial OS=Rattus norvegicus GN=Echs1 PE=1 SV=1	ECHM_RAT	76.21	3	3	21.7628	2.1651	25.9691	3.10816	1.19328	0.0244936
Cytochrome b-c1 complex subunit 1, mitochondrial OS=Rattus norvegicus GN=Uqcrc1 PE=1 SV=1	QCR1_RAT	322.07	11	11	109.874	8.75759	121.259	5.03941	1.10361	0.0273652
Cytochrome b-c1 complex subunit 2, mitochondrial OS=Rattus norvegicus GN=Uqcrc2 PE=1 SV=2	QCR2_RAT	458.56	15	15	166.771	10.584	182.254	8.73782	1.09284	0.0290126
Electron transfer flavoprotein subunit beta OS=Rattus norvegicus GN=Etfb PE=2 SV=3	ETFB_RAT	279.27	8	8	113.227	8.64286	128.034	10.4311	1.13077	0.0321052
ATP synthase subunit beta, mitochondrial OS=Rattus norvegicus GN=Atp5b PE=1 SV=2	ATPB_RAT	1133.02	21	21	740.155	66.1191	843.708	69.395	1.13991	0.0325988
Fatty acid-binding protein, adipocyte OS=Rattus norvegicus GN=Fabp4 PE=1 SV=3	FABP4_RAT	94.85	4	4	48.0624	5.198	55.4663	5.72988	1.15405	0.0426122
Cytochrome c oxidase subunit 2 OS=Rattus norvegicus GN=Mtco2 PE=2 SV=2	COX2_RAT	110.51	4	4	50.9337	4.24996	58.1603	5.86343	1.14188	0.0458192
